# Supplementary material
Source: PubMed Central journal article supplement (PMC6650309)
Supplement: NIHMS1520816-supplement-2.pdf [file NIHMS1520816-supplement-2.pdf]

## Local nascent protein deposition and remodeling guide mesenchymal stromal cell mechanosensing and fate in three-dimensional hydrogels

Claudia Loebel<sup>1,2</sup>, Robert L. Mauck<sup>1,2,3</sup>, Jason A. Burdick<sup>1\*</sup>

<sup>1</sup>Department of Bioengineering, University of Pennsylvania, Philadelphia, Pennsylvania 19104, USA

<sup>2</sup>Translational Musculoskeletal Research Center, Philadelphia VA Medical Center, Philadelphia, Pennsylvania 19104, USA <sup>3</sup>McKay Orthopaedic Research Laboratory, Department of Orthopaedic Surgery, Perelman School of Medicine, University of Pennsylvania, Philadelphia, 19104, USA,

\*Correspondence should be addressed to J.A.B. (email: [burdick2@seas.upenn.edu](mailto:burdick2@seas.upenn.edu))

### Supplementary Figures

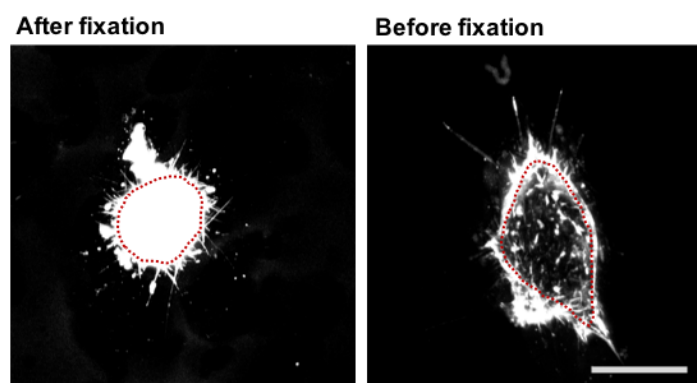

**Supplementary Figure 1 Nascent protein labeling prior to cell fixation reduces intra-cellular protein labeling.** Representative images of a maximum intensity z-projection of methionine-containing nascent proteins labeled with fluorophore-conjugated cyclooctynes (DBCO-488) after (left) and before (right) adding the fixative. Cells were cultured for 3 days within MMP-degradable hyaluronic acid (HA) hydrogels (media supplemented with azidohomoalanine, AHA). Red lines indicate cell boundaries identified with cell membrane staining (scale bar 20  $\mu\text{m}$ , experiment was repeated three times per condition with similar results).

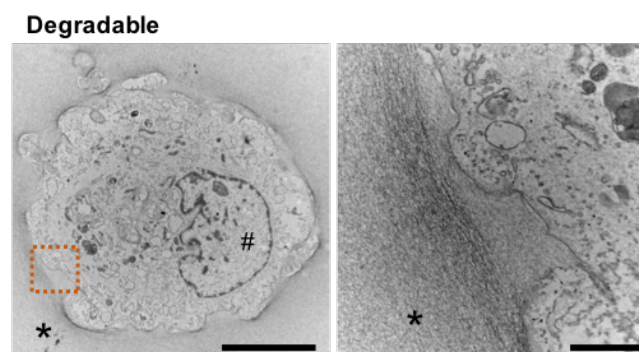

**Supplementary Figure 2 TEM images directly after encapsulation.** Representative transmission electron microscopy (TEM, \* hydrogel, # nucleus) images of hMSCs directly following encapsulation (scale bar 5  $\mu\text{m}$  left, 1  $\mu\text{m}$  right, representative image selected from eight imaged cells). Orange box in left image indicates magnification in right image.

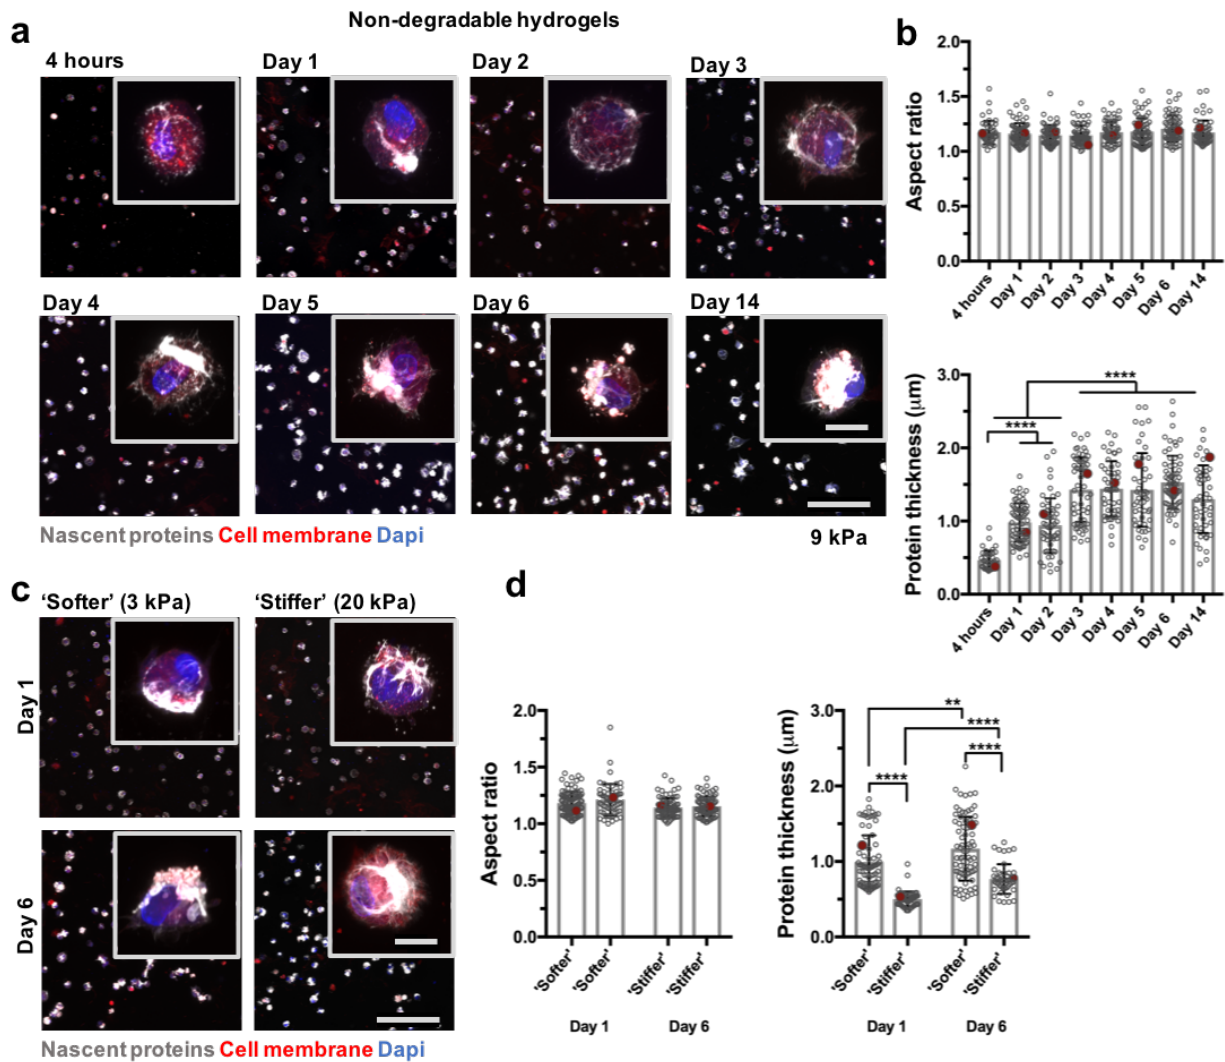

**Supplementary Figure 3 Thickness of accumulated nascent proteins in non-degradable hydrogels is dependent on time and initial hydrogel stiffness.** **a** Representative images of nascent proteins (white) of hMSCs encapsulated in non-degradable NorHA hydrogels ( $9.0 \pm 0.7$  kPa, mean  $\pm$  SD,  $n = 3$  independent measurements) and cultured in growth media (supplemented with AHA) for up to 14 days, visualized via fluorescent DBCO labeling (scale bar  $200 \mu\text{m}$ , inset  $20 \mu\text{m}$ ). **b** Quantification of hMSC aspect ratio and accumulated protein thickness deposited by hMSCs ( $n = 40$  cells (4 hours), 55 cells (day 2, day 4, day 5, day 14) and 70 cells (day 1, day 3, day 6) from 2 biologically independent experiments), mean  $\pm$  SD, \*\*\*\*  $p \leq 0.0001$  by one-way ANOVA with Bonferroni *post hoc*, red dots indicate measurements for representative images in **a**). **c** Representative images of nascent proteins (white) of hMSCs encapsulated in 'softer' ( $3 \pm 0.45$  kPa, mean  $\pm$  SD,  $n = 3$  independent measurements) and 'stiffer' ( $20 \pm 1.1$  kPa, mean  $\pm$  SD,  $n = 3$  independent measurements) NorHA hydrogels and cultured for up to 6 days (scale bar  $200 \mu\text{m}$ , inset  $20 \mu\text{m}$ ). **d** Quantification of hMSC aspect ratio and accumulated protein thickness deposited by hMSCs ( $n = 65$  cells ('softer' day 1, 6, 'stiffer' day 1) and  $n = 46$  cells ('stiffer', day 6) from 2 biologically independent experiments, mean  $\pm$  SD, \*\*\*\*  $p \leq 0.0001$ , \*\*  $p \leq 0.01$  by one-way ANOVA with Bonferroni *post hoc*, red dots indicate measurements for representative images in **c**).

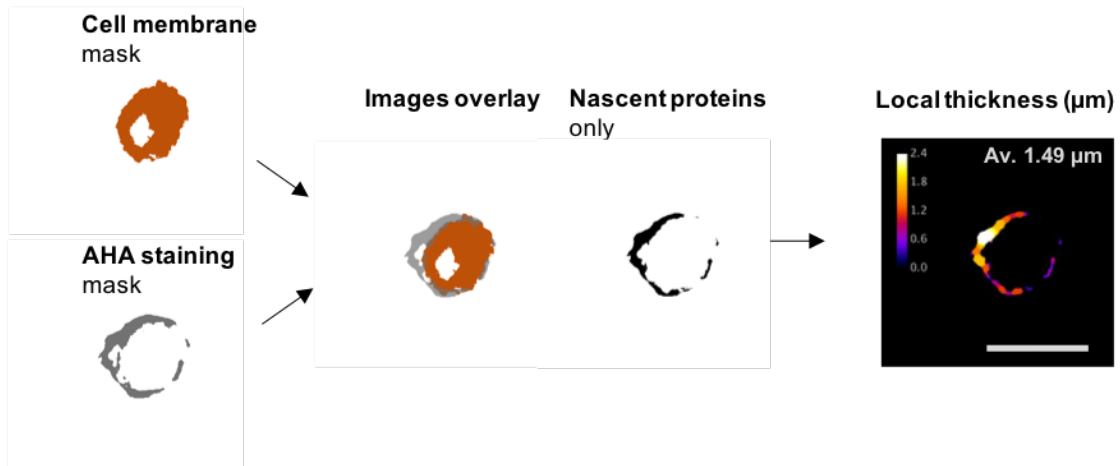

**Supplementary Figure 4 Workflow of nascent protein thickness measurements.** Schematic illustrating the measurement of average local protein thickness in ImageJ using the plugin 'BoneJ' (scale bar 20 µm).

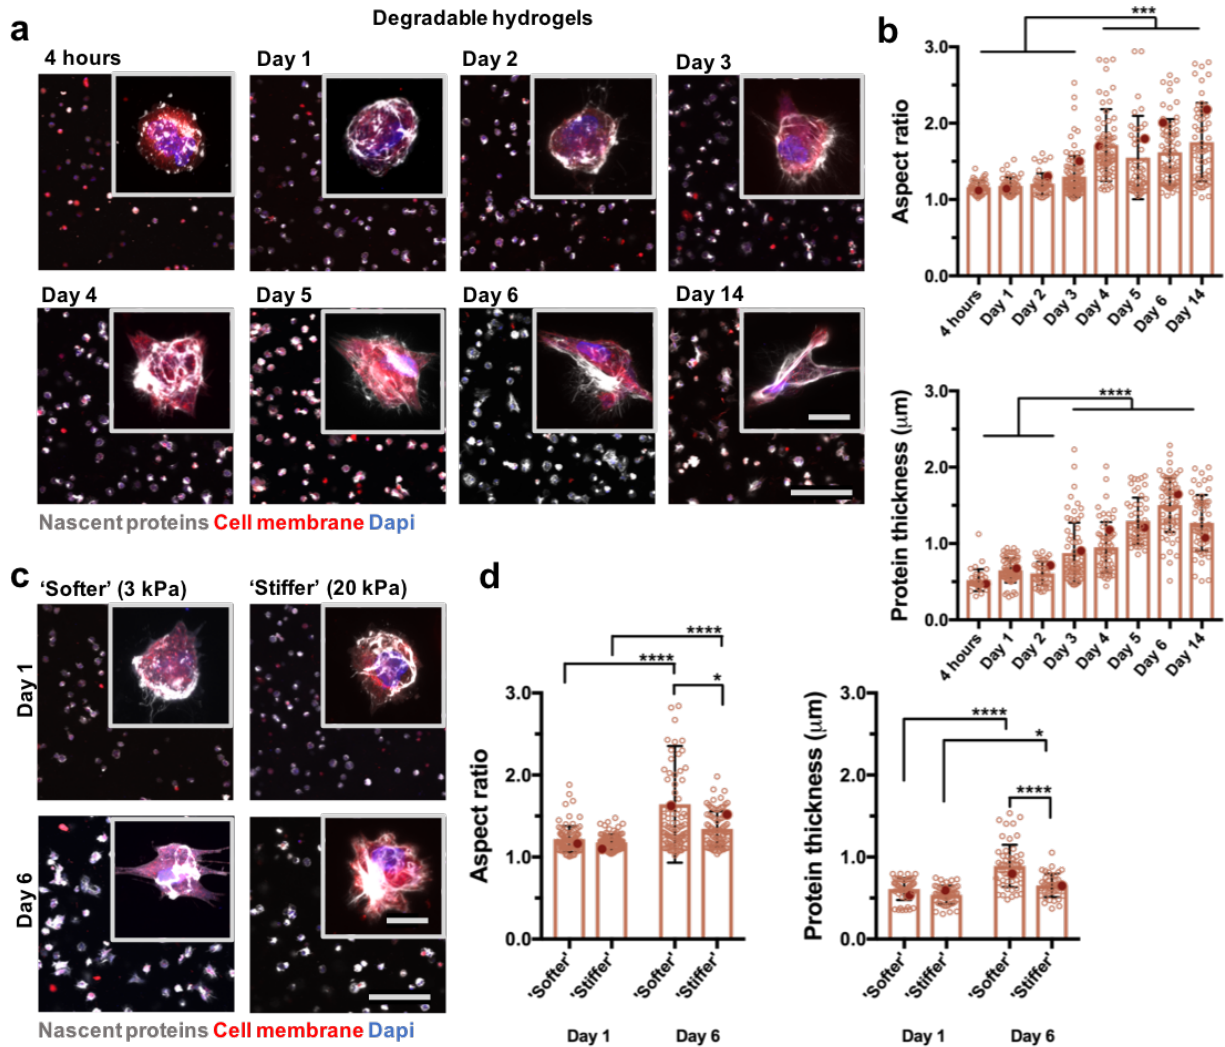

**Supplementary Figure 5 Thickness of accumulated nascent proteins in degradable hydrogels is dependent on time and initial hydrogel stiffness.**

**a** Representative images of nascent proteins (white) of hMSCs encapsulated in degradable NorHA hydrogels ( $9.0 \pm 0.7$  kPa, mean  $\pm$  SD,  $n = 3$  independent measurements) and cultured in growth media (supplemented with AHA) for up to 14 days, visualized via fluorescent DBCO labeling up to 14 days (scale bar  $200 \mu\text{m}$ , inset  $20 \mu\text{m}$ ). **b** Quantification of hMSC aspect ratio and accumulated protein thickness deposited by hMSCs ( $n = 55$  cells per group from 2 biologically independent experiments, mean  $\pm$  SD, \*\*\*\*  $p \leq 0.0001$ , \*\*\*  $p \leq 0.001$  by one-way ANOVA with Bonferroni *post hoc*, red dots indicate measurements for representative images in **a**). **c** Representative images of the nascent proteins (white) of hMSCs encapsulated in 'softer' ( $3 \pm 0.45$  kPa), mean  $\pm$  SD,  $n = 3$  independent measurements and 'stiffer' ( $20 \pm 1.1$  kPa, mean  $\pm$  SD,  $n = 3$  independent measurements) NorHA hydrogels and cultured for up to 6 days (scale bar  $200 \mu\text{m}$ , inset  $20 \mu\text{m}$ ). **d** Quantification of hMSC aspect ratio and accumulated protein thickness deposited by hMSCs ( $n = 65$  cells ('softer' day 1, 6, 'stiffer' day 1) and  $n = 46$  cells ('stiffer', day 6) from 2 biologically independent experiments, mean  $\pm$  SD, \*\*\*\*  $p \leq 0.0001$ , \*  $p \leq 0.05$  by one-way ANOVA with Bonferroni *post hoc*, red dots indicate measurements for representative images in **c**).

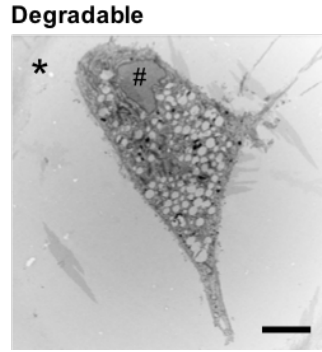

**Supplementary Figure 6 TEM images 6 days after encapsulation.** Representative transmission electron microscopy (TEM, \* hydrogel, # nucleus) image of hMSCs at day 6 (scale bar 5  $\mu\text{m}$ , representative image selected from 6 imaged cells).

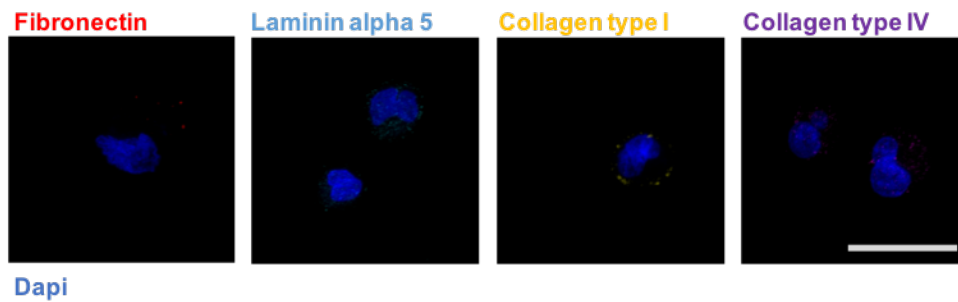

**Supplementary Figure 7 Absence of residual ECM proteins on trypsinized hMSCs.** Representative images of hMSCs stained for fibronectin, laminin  $\alpha 5$  and collagen type 1 and 4 directly following encapsulation in MMP-degradable NorHA hydrogels (scale bar 20  $\mu\text{m}$ , experiments were repeated twice per condition with similar results).

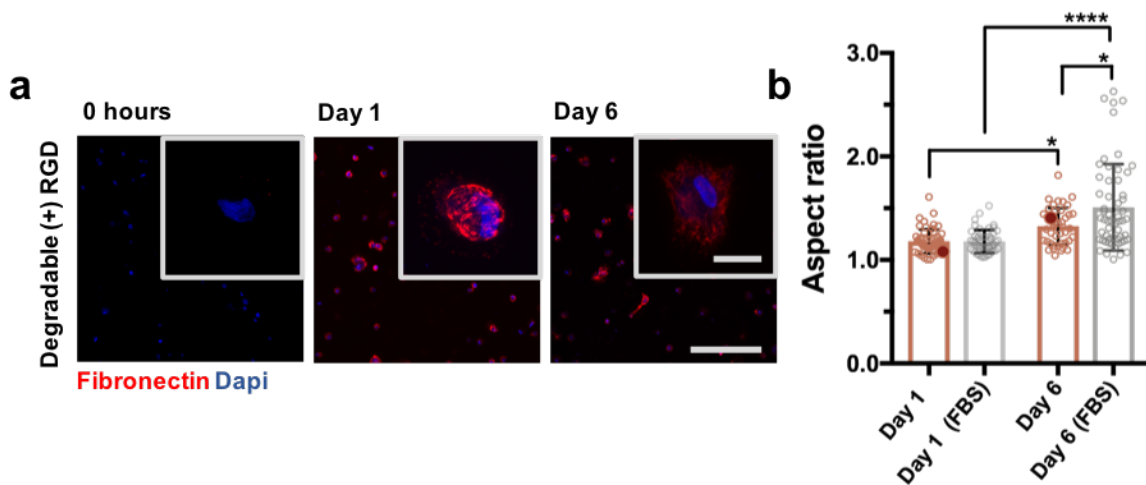

**Supplementary Figure 8 hMSC spreading and nascent protein deposition in serum-free, chemically defined media.** **a** Representative images of fibronectin stained hMSCs directly following encapsulation (0 hours) or after culture for 1 or 6 days in serum-free, chemically defined media (scale bar 200  $\mu\text{m}$ , inset 20  $\mu\text{m}$ ). **b** Quantification of aspect ratio of hMSCs in degradable NorHA hydrogels ( $n = 54$  (day 1, day 1 (FBS)),  $n = 58$  (day 6 (FBS)) and  $n = 45$  (day 6) from 2 biologically independent experiments, mean  $\pm$  SD, \*\*\*\*  $p \leq 0.0001$ , \*  $p \leq 0.05$ , by one-way ANOVA with Bonferroni *post hoc*, red dots indicate measurements for representative images in **a**).

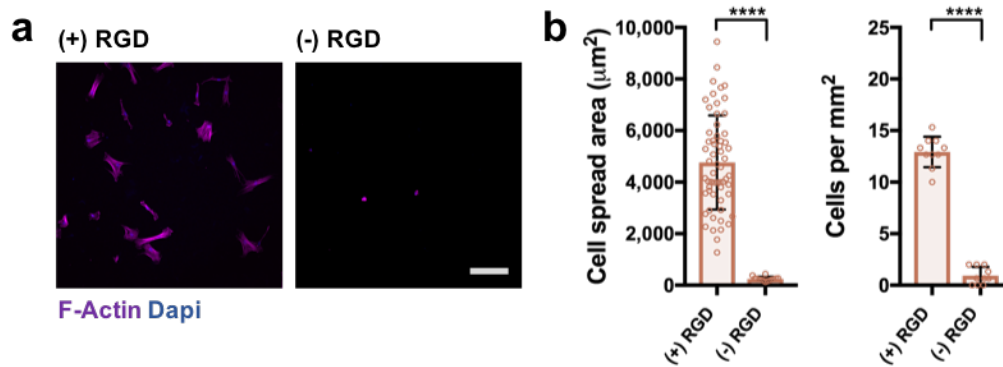

**Supplementary Figure 9 Lack of cell attachment and spreading atop unmodified hydrogels. a** Representative images of F-Actin immunostaining of hMSCs cultured in growth media (supplemented with AHA) for 18 hours on degradable hydrogels modified with 1 mM RGD ((+) RGD) or unmodified ((-) RGD, scale bar 200  $\mu\text{m}$ ). **b** Quantification of cell spread area (representative images in **a**),  $n = 60$  cells ((+) RGD),  $n = 14$  ((-) RGD) from 2 biologically independent experiments) and cell number per  $\text{mm}^2$ ,  $n = 10$  ROIs from 2 biologically independent experiments), mean  $\pm$  SD, \*\*\*\*  $p \leq 0.0001$  by two-tailed Student's *t*-test).

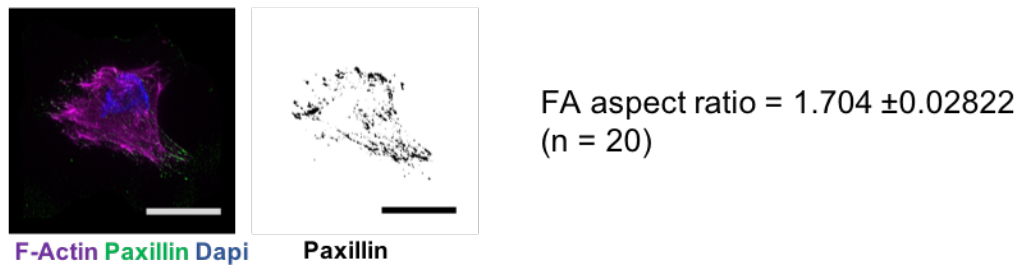

**Supplementary Figure 10 Formation of focal adhesions in degradable hydrogels.** Representative image of F-Actin and Paxillin immunofluorescence and binary image of Paxillin of an hMSC cultured in an MMP-degradable NorHA hydrogel at day 6 (scale bars 20  $\mu\text{m}$ ,  $n = 20$  cells from 2 biologically independent experiments).

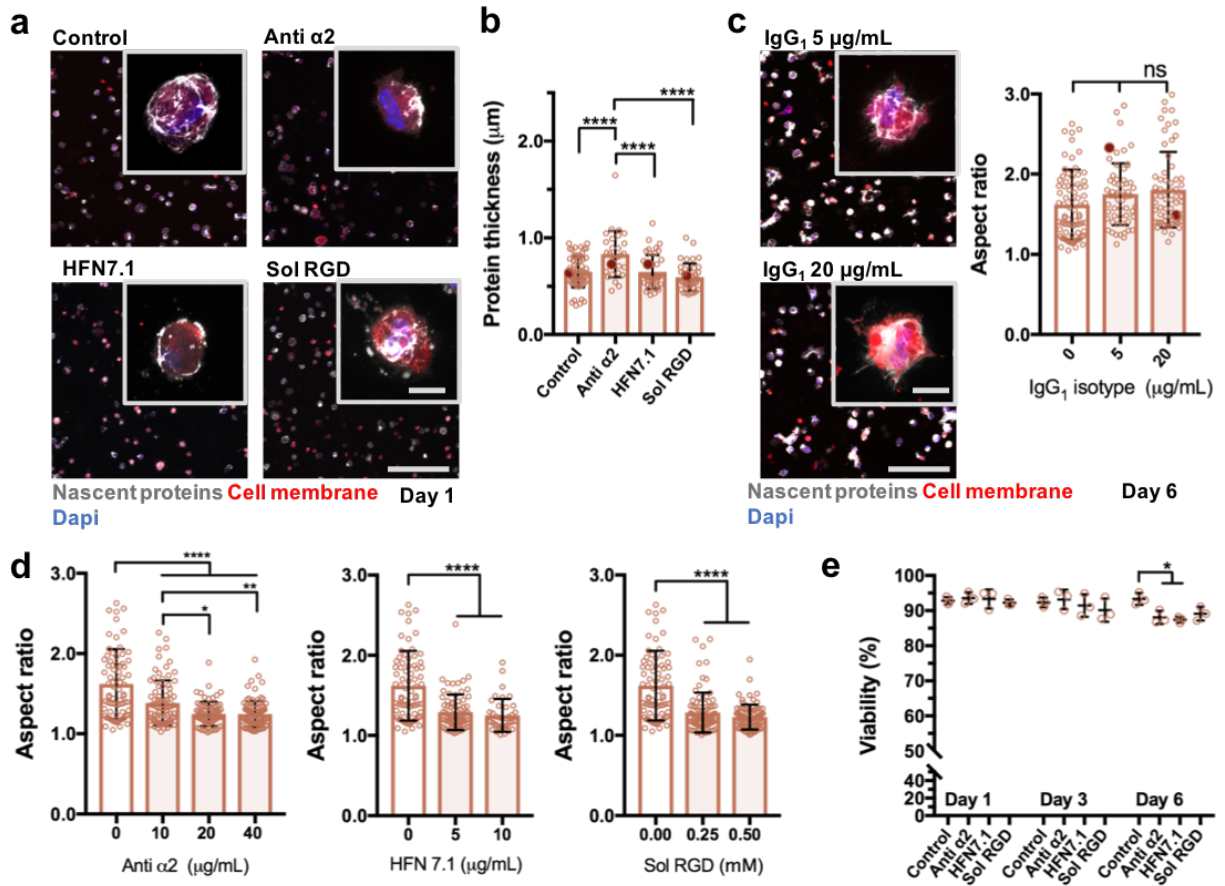

**Supplementary Figure 11 Influence of inhibitors of nascent protein adhesion on cell spreading and viability.** **a** Representative images and **b** quantification of accumulated nascent proteins (white) of hMSCs encapsulated in degradable hydrogels modified with RGD (1 mM) and treated with anti Integrin  $\alpha 2$  (anti  $\alpha 2$ , 20  $\mu\text{g}/\text{mL}$ ), human fibronectin (HFN7.1, 5  $\mu\text{g}/\text{mL}$ ) or soluble RGD (sol RGD, 0.5 mM, scale bar 200  $\mu\text{m}$ , inset 20  $\mu\text{m}$ , (quantifications:  $n = 70$  cells (control),  $n = 29$  (anti  $\alpha 2$ ),  $n = 41$  cells (HFN7.1),  $n = 30$  cells (sol RGD) from 2 biologically independent experiments), mean  $\pm$  SD, \*\*\*\*  $p \leq 0.0001$  by one-way ANOVA with Bonferroni *post hoc*, red dots indicate measurements for representative images in **a**). **c** Representative images and quantification of aspect ratio of hMSCs encapsulated in degradable NorHA hydrogels and treated with IgG1 isotype control antibody (scale bar 200  $\mu\text{m}$ , inset 20  $\mu\text{m}$ , 5, 20  $\mu\text{g}/\text{mL}$ ,  $n = 60$  cells per group from 2 biologically independent experiments), mean  $\pm$  SD, with no significant difference by one-way ANOVA with Bonferroni *post hoc*). **d** Quantification of the aspect ratio of hMSCs encapsulated in degradable NorHA hydrogels and treated with anti  $\alpha 2$  (10, 20, 40  $\mu\text{g}/\text{mL}$ ), HFN7.1 (5, 10  $\mu\text{g}/\text{mL}$ ) or sol RGD (0.25, 0.5 mM,  $n = 80$  cells (anti  $\alpha 2$ ),  $n = 54$  cells (HFN7.1),  $n = 82$  cells (sol RGD) from 2 biologically independent experiments), mean  $\pm$  SD, \*\*\*\*  $p \leq 0.0001$ , \*\*  $p \leq 0.01$ , \*  $p \leq 0.05$ , by one-way ANOVA with Bonferroni *post hoc*). **e** Viability (analyzed with live-dead staining) of hMSCs treated with anti  $\alpha 2$  (20  $\mu\text{g}/\text{mL}$ ), HFN7.1 (5  $\mu\text{g}/\text{mL}$ ), sol RGD (0.5 mM, from 2 biologically independent experiments), mean  $\pm$  SD, \*  $p \leq 0.05$  by one-way ANOVA with Bonferroni *post hoc*).

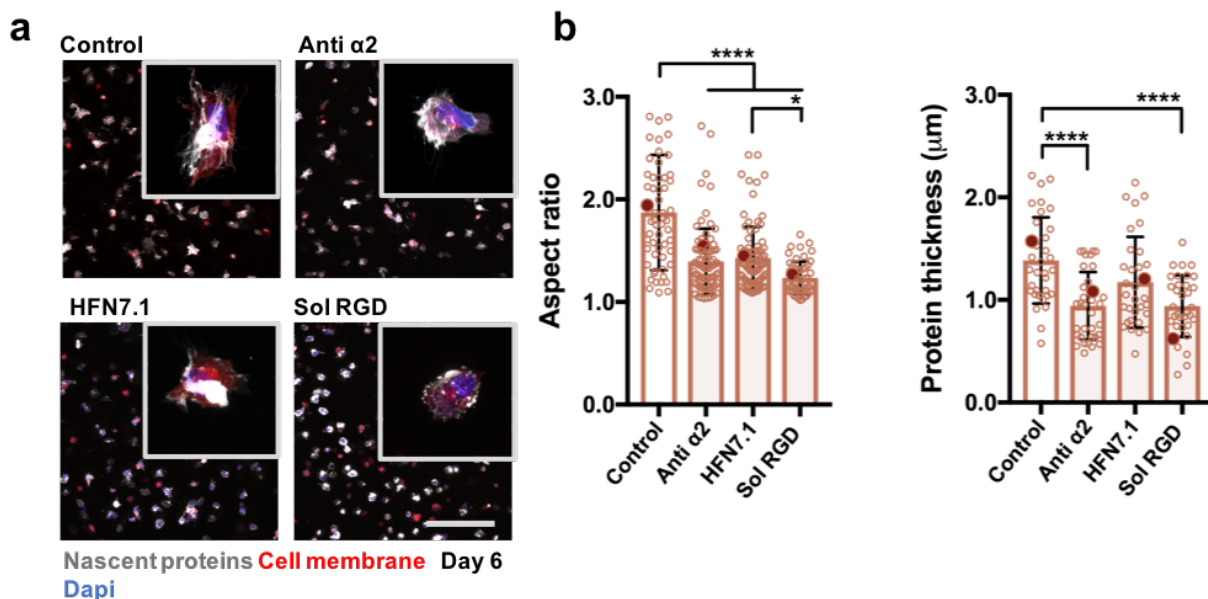

**Supplementary Figure 12 Nascent protein deposition and cell spreading in bipotential adipogenic-osteogenic media.** Representative images of the accumulated nascent proteins (white) of hMSCs encapsulated in degradable NorHA hydrogels with 1 mM RGD, cultured in adipogenic-osteogenic media (supplemented with AHA) and treated with anti Integrin  $\alpha 2$  (anti  $\alpha 2$ , 20  $\mu\text{g}/\text{mL}$ ), HFN7.1 (5  $\mu\text{g}/\text{mL}$ ) or soluble RGD (sol RGD, 0.5 mM), for 6 days (scale bar 200  $\mu\text{m}$ , inset 20  $\mu\text{m}$ ). **b** Quantification of aspect ratio and accumulated protein thickness deposited by hMSCs (aspect ratio:  $n = 57$  cells (control, sol RGD),  $n = 83$  cells (anti  $\alpha 2$ , HFN7.1),  $n = 68$  (day 6, day 14); protein thickness:  $n = 34$  per group from 2 biologically independent experiments), mean  $\pm$  SD, \*\*\*\*  $p \leq 0.001$ , \*  $p \leq 0.05$ , by one-way ANOVA with Bonferroni *post hoc*, red dots indicate measurements for representative images in **a**).

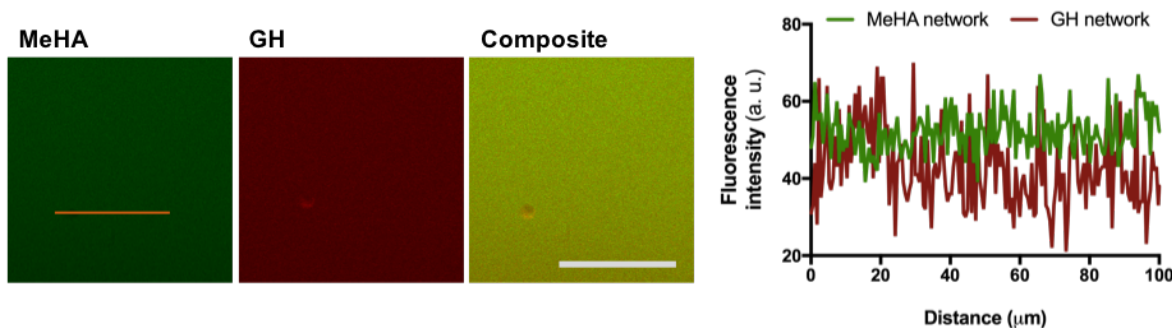

**Supplementary Figure 13 Microstructural homogeneity of DN hydrogels.** Representative confocal images of double network (DN) hydrogels (guest-host (GH) 2.50%, covalent crosslink ratio 0.3) directly following crosslinking, in which methacrylated hyaluronic acid (MeHA) and GH networks were separately labeled (MeHA with thiolated fluorescein isothiocyanate (FITC, green) and GH with cyclodextrin-658 (red) (scale bar 100  $\mu\text{m}$ , experiments were repeated twice with similar results). Orange line indicates the pixel regions used to generate intensity profiles of MeHA and GH networks.



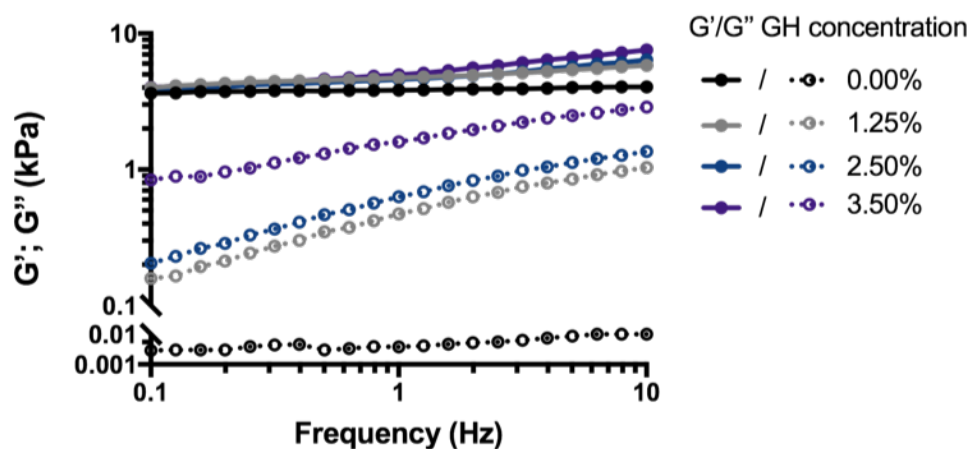

**Supplementary Figure 14 Frequency dependence of DN hydrogel properties.** Representative oscillatory frequency sweeps of double-network (DN) hydrogels with varied guest-host (GH) concentration (covalent crosslink ratio 0.3, shear elastic moduli ( $G'$ , continuous lines) and shear viscous moduli ( $G''$ , dashed lines). Measurements were taken at 0.5% strain and repeated three times per group with similar results.

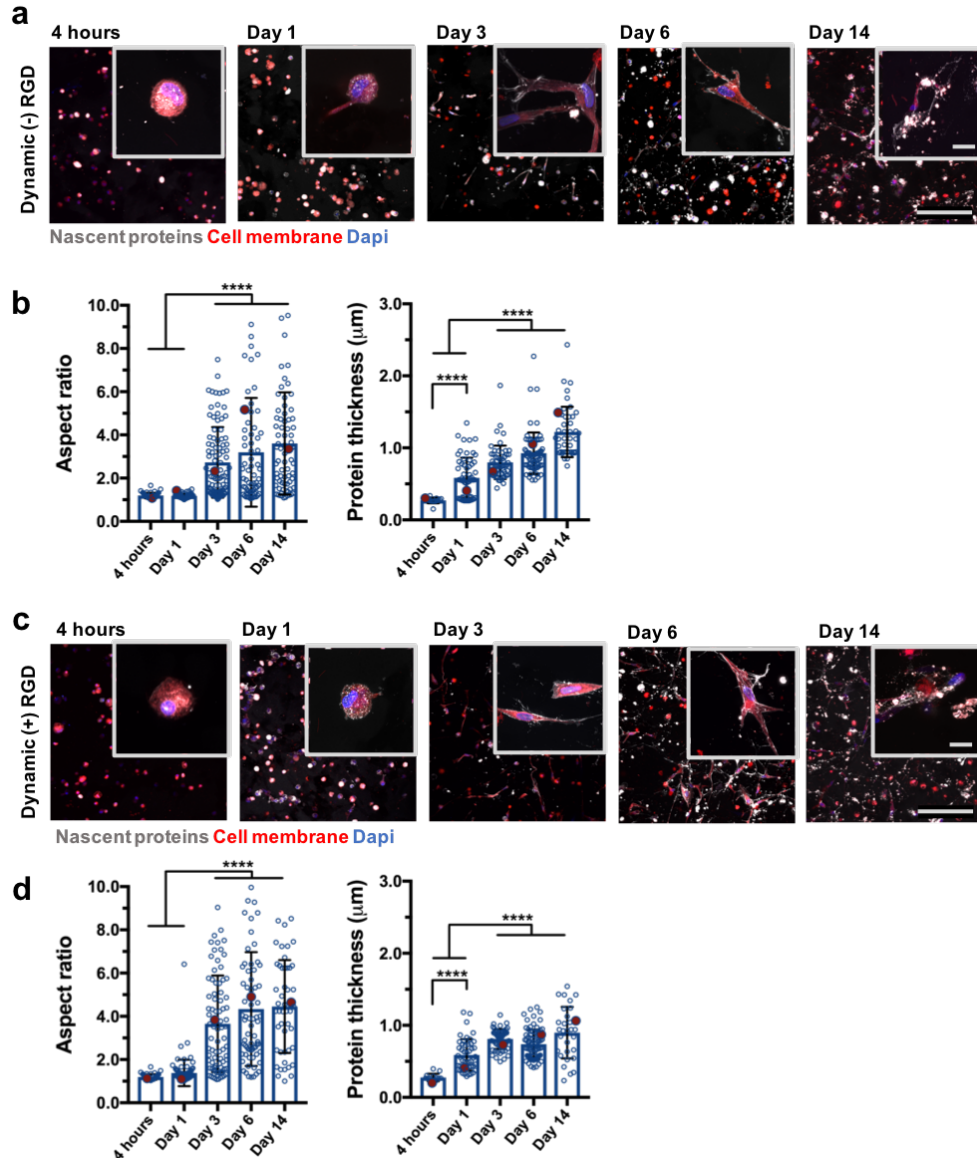

**Supplementary Figure 15 Thickness of accumulated nascent proteins in dynamic hydrogels is dependent on time.** **a** Representative images of the accumulated nascent proteins (white) of hMSCs encapsulated in dynamic double-network (DN) hydrogels without RGD modification and cultured in growth media (supplemented with AHA) up to 14 days (scale bar 200  $\mu\text{m}$ , inset 20  $\mu\text{m}$ ). **b** Quantification of aspect ratio and accumulated protein thickness deposited by hMSCs (aspect ratio:  $n = 51$  cells (4 hours),  $n = 85$  cells (day 1, day 3),  $n = 68$  (day 6, day 14); protein thickness:  $n = 70$  (4 hours, day 1, day 3, day 6),  $n = 47$  (day 14) from 2 biologically independent experiments), mean  $\pm$  SD, \*\*\*\*  $p \leq 0.0001$  by one-way ANOVA with Bonferroni *post hoc*, red dots indicate measurements for representative images in **a**). **c** Representative images of the accumulated nascent proteins (white) of hMSCs encapsulated in dynamic double-network (DN) hydrogels with 1 mM RGD and cultured in growth media (supplemented with AHA) up to 14 days (scale bar 200  $\mu\text{m}$ , inset 20  $\mu\text{m}$ ). **d** Quantification of aspect ratio and accumulated protein thickness deposited by hMSCs (aspect ratio:  $n = 51$  cells (4 hours),  $n = 92$  cells (day 1),  $n = 83$  (day 3),  $n = 71$  (day 6) and  $n = 48$  (day 14); protein thickness:  $n = 31$  (4 hours),  $n = 58$  (day 1, day 3, day 6),  $n = 30$  (day 14) from 2 biologically independent experiments), mean  $\pm$  SD, \*\*\*\*  $p \leq 0.0001$  by one-way ANOVA with Bonferroni *post hoc*, red dots indicate measurements for representative images in **c**).

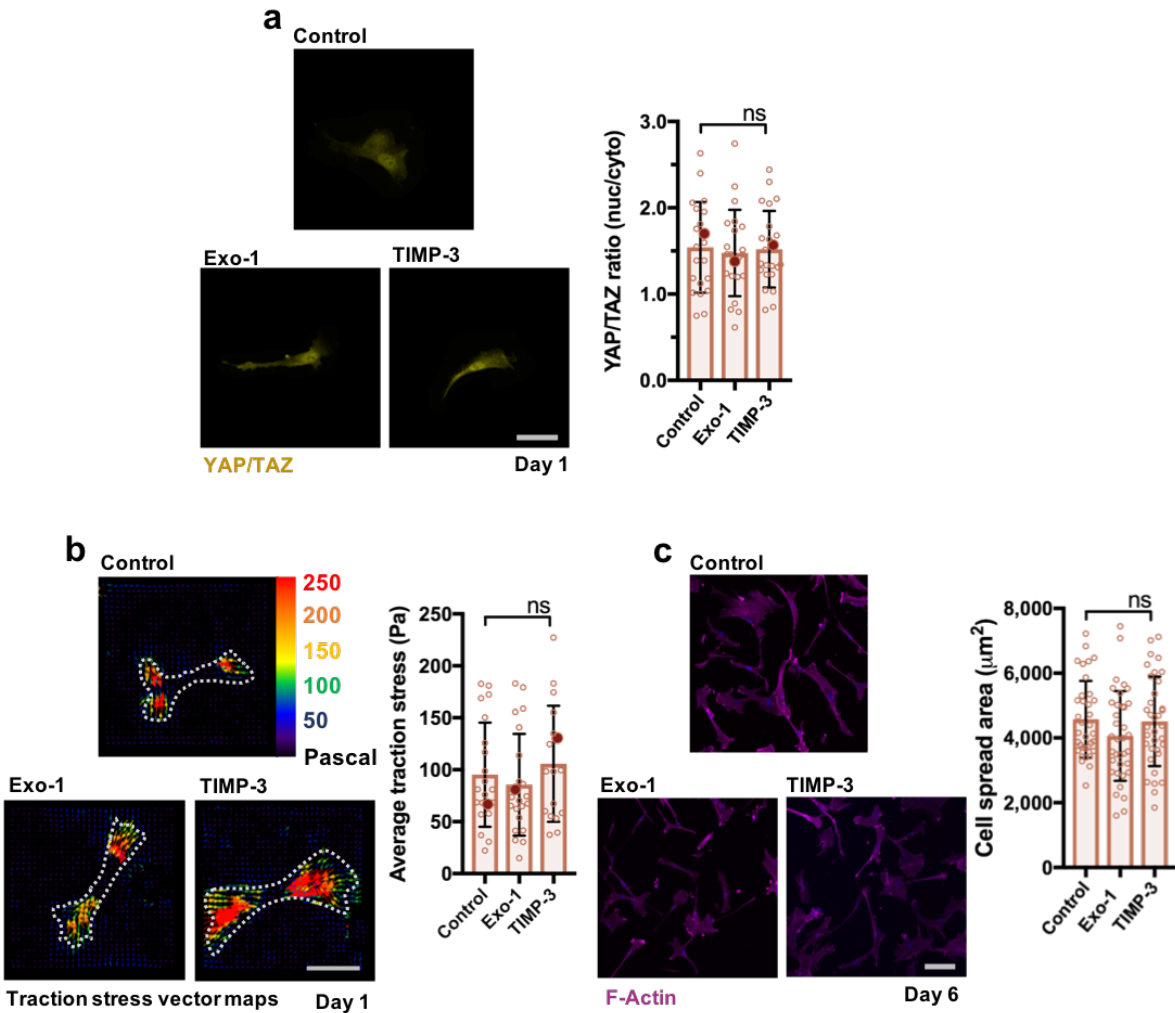

**Supplementary Figure 16 Treatment with Exo-1 or TIMP-3 does not attenuate hMSC spreading or contractility atop HA hydrogels.** **a** Representative images of YAP/TAZ immunostaining and quantification of nuclear to cytoplasmic (nuc/cyto) ratio of hMSCs cultured on top of non-degradable NorHA hydrogels (9 kPa, (+) RGD) for 24 h (day 1) in “AHA growth media” supplemented with DMSO only, 5 nM TIMP-3 or 120 nM Exo-1 (scale bar 50  $\mu\text{m}$ ,  $n = 22$  cells per group from 2 biologically independent experiments, mean  $\pm$  SD with no significant difference by one-way ANOVA with Bonferroni *post hoc*). **b** Representative traction stress vector maps and quantification of average traction stress of hMSCs at day 1 (scale bar 50  $\mu\text{m}$ ,  $n = 23$  cells per group from 2 biologically independent experiments, mean  $\pm$  SD with no significant difference by one-way ANOVA with Bonferroni *post hoc*). **c** Representative images of F-Actin and quantification of cell spread area after 6 days (scale bar 50  $\mu\text{m}$ ,  $n = 36$  cells per group from 2 biologically independent experiments, mean  $\pm$  SD with no significant difference by one-way ANOVA with Bonferroni *post hoc*).

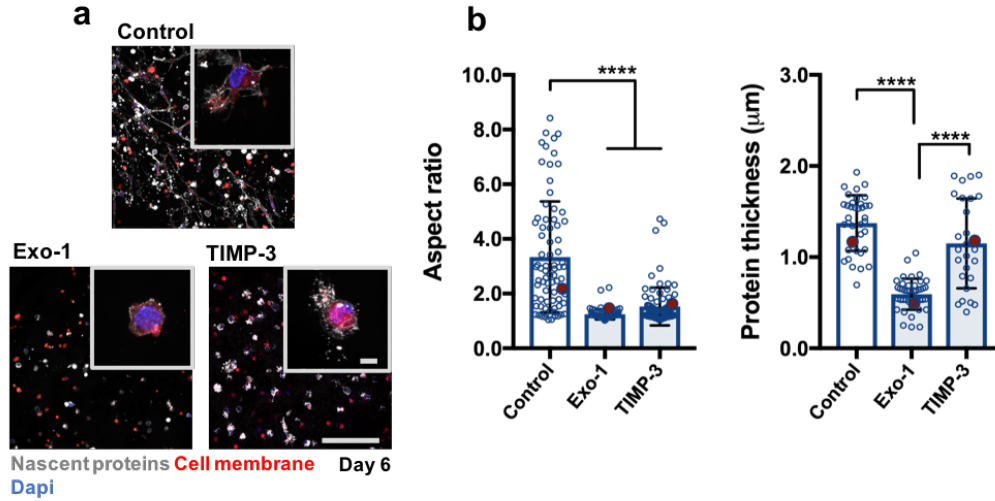

**Supplementary Figure 17 Nascent protein deposition and cell spreading in bipotential adipogenic-osteogenic media.** Representative images of accumulated nascent proteins (white) of hMSCs encapsulated in dynamic DN hydrogels without RGD modification and cultured in adipogenic-osteogenic media (supplemented with AHA) for 6 days (scale bar 200  $\mu\text{m}$ , inset 20  $\mu\text{m}$ ). **b** Quantification of aspect ratio and accumulated protein thickness deposited by hMSCs (aspect ratio:  $n = 79$  cells (control, Exo-1),  $n = 88$  cells (TIMP-3)); protein thickness:  $n = 42$  (control, Exo-1),  $n = 28$  (TIMP-3) from 2 biologically independent experiments), mean  $\pm$  SD, \*\*\*\*  $p \leq 0.0001$  by one-way ANOVA with Bonferroni *post hoc*, red dots indicate measurements for representative images in a).

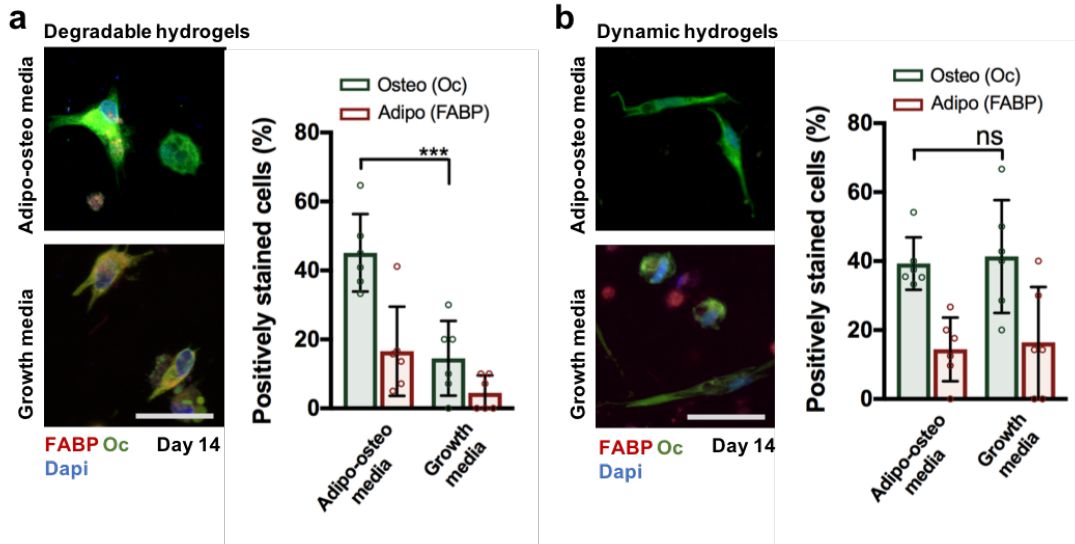

**Supplementary Figure 18 Comparison of hMSC differentiation in growth and adipogenic-osteogenic media.** Immunostaining for fatty-acid binding protein (FABP, adipogenic marker) and osteocalcin (Oc, osteogenic marker) and quantification of positively stained cells (percentage, %) towards osteogenesis (positive for Oc) and adipogenesis (positive for FABP) after 14 days in adipogenic-osteogenic media or hMSC growth media in **a** degradable NorHA and **b** dynamic DN hydrogels (scale bar 50  $\mu\text{m}$ , quantification:  $n = 6$  hydrogels from 2 biologically independent experiments), mean  $\pm$  SD, \*\*\*  $p \leq 0.001$  and no significant difference (ns) by one-way ANOVA with Bonferroni *post hoc*.

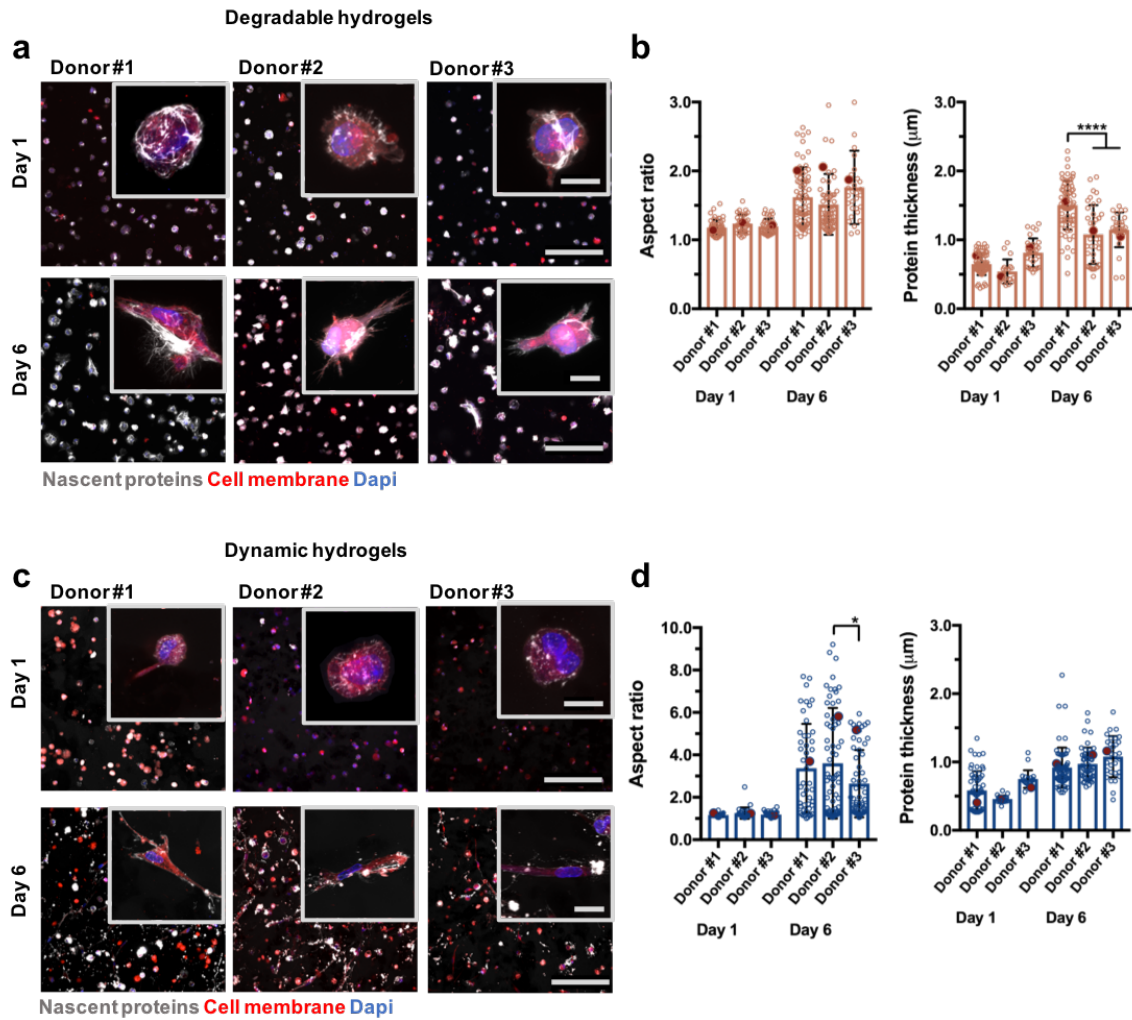

**Supplementary Figure 19 hMSC donor dependence on spreading and accumulation of nascent proteins in degradable and dynamic hydrogels.** **a** Representative images of nascent proteins (white) for 3 different hMSC donors (#1 male 23 years, #2 female 18 years, #3 male 22 years) encapsulated in degradable hydrogels modified with RGD (1 mM) and cultured in growth media (supplemented with AHA) up to 6 days (scale bar 200  $\mu\text{m}$ , inset 20  $\mu\text{m}$ ). **b** Quantification of the aspect ratio and accumulated nascent protein thickness of hMSCs encapsulated in degradable hydrogels (aspect ratio:  $n = 51$  cells (Donor #1),  $n = 75$  (Donor #2),  $n = 60$  (Donor #3); protein thickness:  $n = 79$  cells (Donor #1),  $n = 41$  (Donor #2),  $n = 30$  (Donor #3) from 2 biologically independent experiments; mean  $\pm$  SD, \*\*\*\*  $p \leq 0.0001$  by one-way ANOVA with Bonferroni *post hoc*, red dots indicate measurements for representative images in **a**). **c** Representative images of nascent proteins (white) for 3 different hMSC donors encapsulated in dynamic DN hydrogels without RGD and cultured in growth media (supplemented with AHA) for up to 6 days (scale bar 200  $\mu\text{m}$ , inset 20  $\mu\text{m}$ ). **d** Quantification of the aspect ratio and accumulated nascent proteins of hMSCs (aspect ratio:  $n = 79$  cells (Donor #1),  $n = 63$  (Donor #2),  $n = 30$  (Donor #3); protein thickness:  $n = 75$  cells (Donor #1),  $n = 54$  (Donor #2),  $n = 32$  (Donor #3) from 2 biologically independent experiments; mean  $\pm$  SD, \*  $p \leq 0.05$  by one-way ANOVA with Bonferroni *post hoc*, red dots indicate measurements for representative images in **c**).

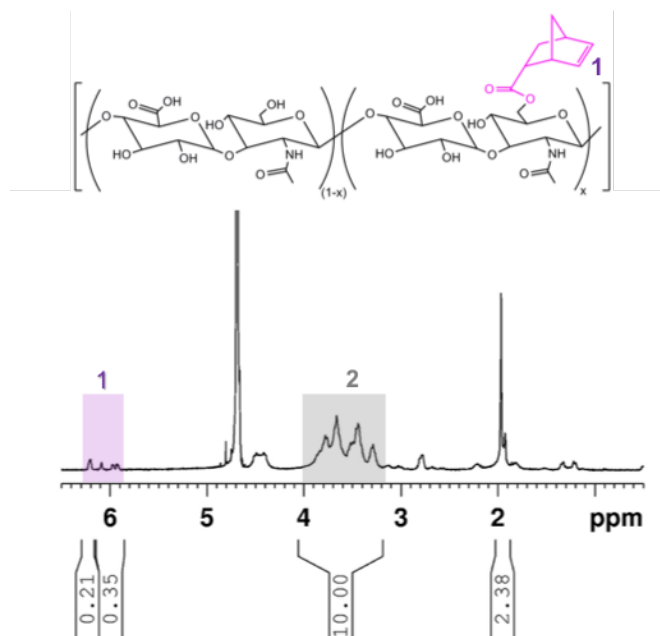

**Supplementary Figure 20** <sup>1</sup>H NMR spectrum of norbornene-functionalized hyaluronic acid (NorHA) in D<sub>2</sub>O. Modification of HA with norbornene (23%) determined by integration of vinyl protons (2H, shaded violet) relative to the sugar ring of HA (10H, shaded grey), analysis was done on each batch used to ensure consistency of modification.

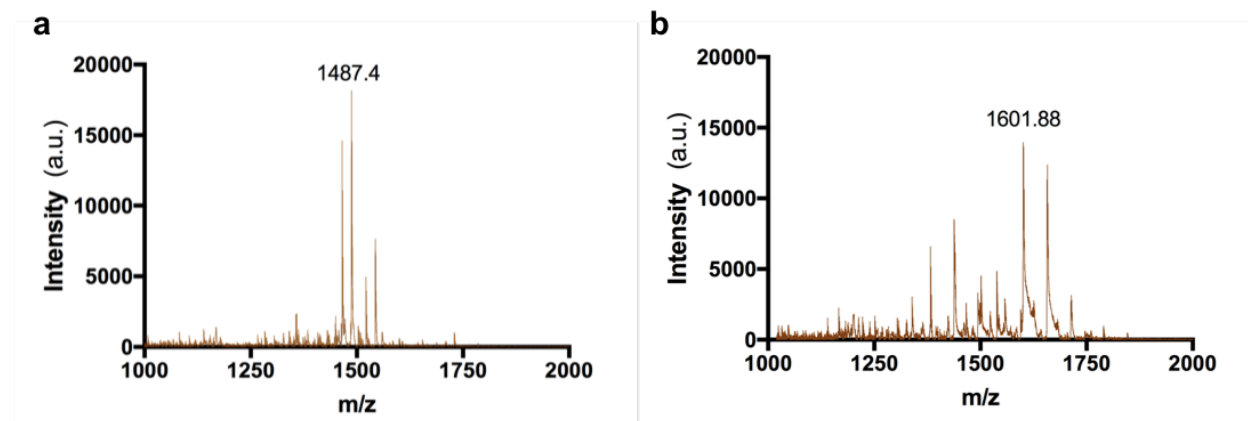

**Supplementary Figure 21** MALDI spectra of dithiol peptide crosslinkers. Matrix Assisted Laser Desorption/Ionization (MALDI) spectra for **a** non-degradable dithiol peptide (sequence GCHGNSGGSGGNEECG) with an expected mass (plus alcohol from resin) of 1462 g/mol and actual mass of 1487 g/mol, and **b** degradable dithiol peptide (sequence GCNSVPMSMRGGSNCG) with an expected mass (plus alcohol from resin) of 1597 g/mol and actual mass of 1602 g/mol, all studies were performed with the same batch of material.

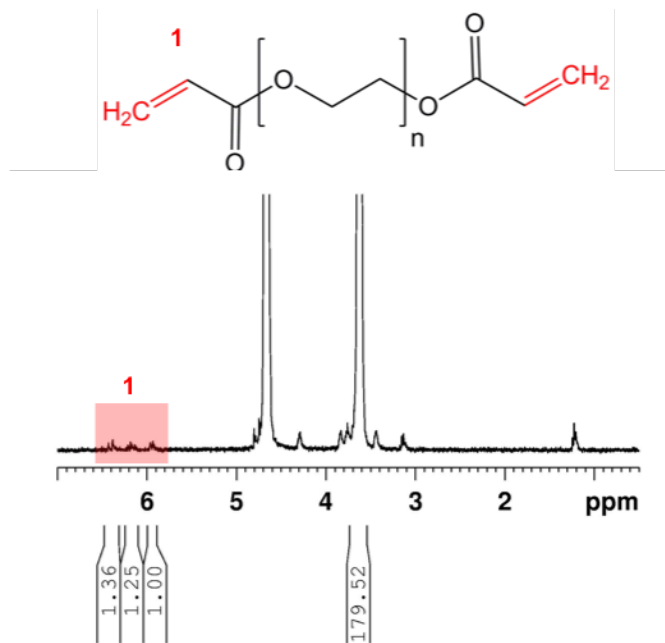

**Supplementary Figure 22** <sup>1</sup>H NMR spectrum of poly(ethylene glycol)-diacrylate (PEG-DA) in D<sub>2</sub>O. Modification of PEG (10 kDa) with acrylates on both ends determined by integration of the acrylate end-groups (each 1H, shaded red), all studies were performed with the same batch of material.

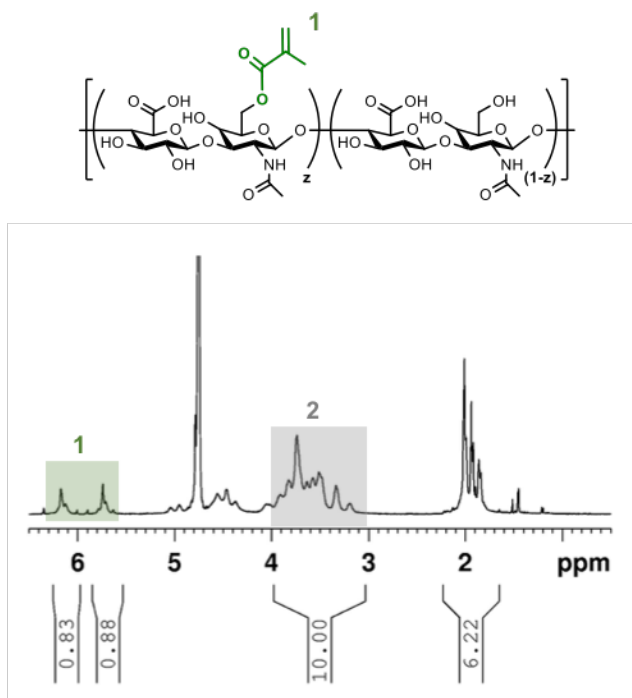

**Supplementary Figure 23** <sup>1</sup>H NMR spectrum of methacrylated hyaluronic acid (MeHA) in D<sub>2</sub>O. Methacrylate modification (86%) determined by integration of the vinyl protons (1H each, shaded green) relative to the sugar ring of HA (10H, shaded grey), all studies were performed with the same batch of material.

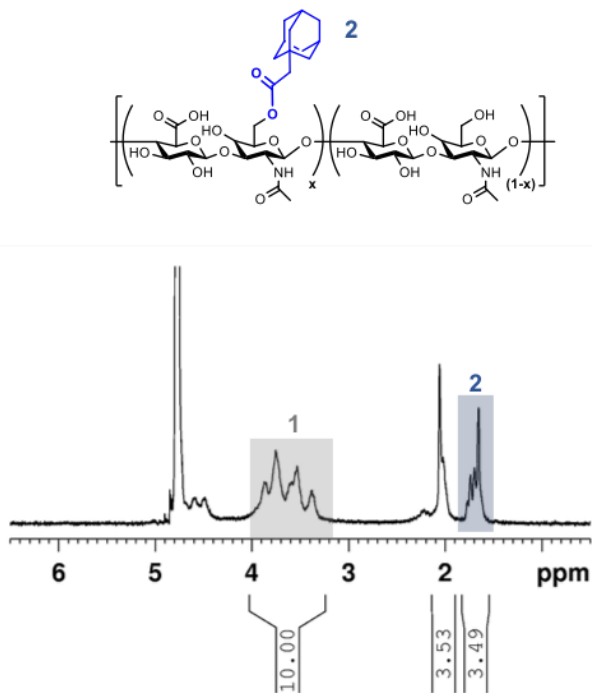

**Supplementary Figure 24** <sup>1</sup>H NMR spectrum of adamantane-functionalized hyaluronic acid (Ad-HA) in D<sub>2</sub>O. Modification of HA with Ad (29%) determined by integration of the ethyl multiplet (12H, shaded blue) relative to the sugar ring of HA (10H, shaded grey), all studies were performed with the same batch of material.

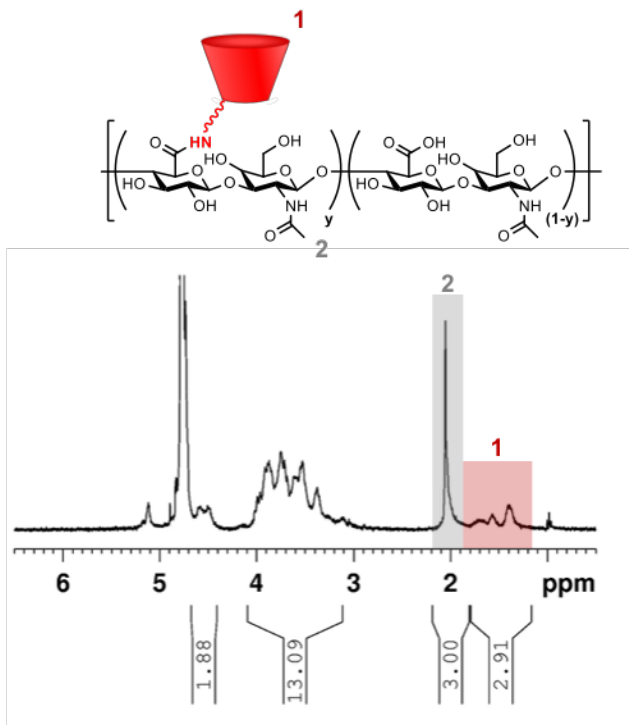

**Supplementary Figure 25** <sup>1</sup>H NMR spectrum of β-cyclodextrin-functionalized hyaluronic acid (CD-HA) in D<sub>2</sub>O. Modification of HA with CD (24.3%) determined by integration of the hexane linkers (12H, shaded red) relative to the N-acetyl singlet of HA (3H, shaded grey), all studies were performed with the same batch of material.



## Supplementary Table

| Figure                      | Panel                                       | Statistical Test                            | Comparison                  | P-value  | F-value/t-value                             | Degrees of freedom          |         |        |     |
|-----------------------------|---------------------------------------------|---------------------------------------------|-----------------------------|----------|---------------------------------------------|-----------------------------|---------|--------|-----|
| 1                           | e                                           | ANOVA<br>Bonferroni<br><i>post-hoc</i> test | 4 hours vs. Day 2           | <0.0001  | 6.671                                       | 207                         |         |        |     |
|                             |                                             |                                             | 4 hours vs. Day 4           | <0.0001  | 13.5                                        | 207                         |         |        |     |
|                             |                                             |                                             | 4 hours vs. Day 6           | <0.0001  | 15.73                                       | 207                         |         |        |     |
|                             |                                             |                                             | Day 2 vs. Day 4             | <0.0001  | 7.526                                       | 207                         |         |        |     |
|                             |                                             |                                             | Day 2 vs. Day 6             | <0.0001  | 9.565                                       | 207                         |         |        |     |
|                             |                                             |                                             | Day 4 vs. Day 6             | >0.9999  | 1.38                                        | 207                         |         |        |     |
|                             |                                             |                                             | 2                           | c (left) | ANOVA<br>Bonferroni<br><i>post-hoc</i> test | Day 1 vs. Day 2             | >0.9999 | 0.3515 | 253 |
| Day 1 vs. Day 4             | <0.0001                                     | 8.104                                       |                             |          |                                             | 253                         |         |        |     |
| Day 1 vs. Day 6             | <0.0001                                     | 6.666                                       |                             |          |                                             | 253                         |         |        |     |
| Day 2 vs. Day 4             | <0.0001                                     | 7.715                                       |                             |          |                                             | 253                         |         |        |     |
| Day 2 vs. Day 6             | <0.0001                                     | 6.278                                       |                             |          |                                             | 253                         |         |        |     |
| Day 4 vs. Day 6             | 0.6522                                      | 1.61                                        |                             |          |                                             | 253                         |         |        |     |
| c (right)                   | ANOVA<br>Bonferroni<br><i>post-hoc</i> test | Day 1 vs. Day 2                             |                             | >0.9999  | 0.7499                                      | 234                         |         |        |     |
|                             |                                             | Day 1 vs. Day 4                             |                             | <0.0001  | 6.228                                       | 234                         |         |        |     |
|                             |                                             | Day 1 vs. Day 6                             |                             | <0.0001  | 18.31                                       | 234                         |         |        |     |
|                             |                                             | Day 2 vs. Day 4                             |                             | <0.0001  | 6.238                                       | 234                         |         |        |     |
|                             |                                             | Day 2 vs. Day 6                             |                             | <0.0001  | 16.79                                       | 234                         |         |        |     |
|                             |                                             | Day 4 vs. Day 6                             |                             | <0.0001  | 11.42                                       | 234                         |         |        |     |
|                             |                                             | 3                                           |                             | b (left) | ANOVA<br>Bonferroni<br><i>post-hoc</i> test | Control vs. Sol RGD         | <0.0001 | 11.42  | 554 |
|                             |                                             |                                             |                             |          |                                             | Control vs. Anti $\alpha$ 2 | <0.0001 | 9.218  | 554 |
| Control vs. HFN7.1          | <0.0001                                     |                                             | 8.128                       |          |                                             | 554                         |         |        |     |
| Sol RGD vs. Anti $\alpha$ 2 | 0.0306                                      |                                             | 2.812                       |          |                                             | 554                         |         |        |     |
| Sol RGD vs. HFN7.1          | 0.001                                       |                                             | 3.828                       |          |                                             | 554                         |         |        |     |
| Anti $\alpha$ 2 vs. HFN7.1  | >0.9999                                     |                                             | 1.093                       |          |                                             | 554                         |         |        |     |
| b (right)                   | ANOVA<br>Bonferroni<br><i>post-hoc</i> test |                                             | Control vs. Sol RGD         | 0.0258   | 2.884                                       | 233                         |         |        |     |
|                             |                                             |                                             | Control vs. Anti $\alpha$ 2 | 0.0545   | 2.631                                       | 233                         |         |        |     |
|                             |                                             |                                             | Control vs. HFN7.1          | >0.9999  | 0.3944                                      | 233                         |         |        |     |
|                             |                                             |                                             | Sol RGD vs. Anti $\alpha$ 2 | <0.0001  | 5.299                                       | 233                         |         |        |     |
|                             |                                             |                                             | Sol RGD vs. HFN7.1          | 0.009    | 2.982                                       | 233                         |         |        |     |
|                             |                                             |                                             | Anti $\alpha$ 2 vs. HFN7.1  | 0.2721   | 2.012                                       | 233                         |         |        |     |
| d                           | ANOVA<br>Bonferroni<br><i>post-hoc</i> test | Control vs. Sol RGD                         | <0.0001                     | 9.047    | 185                                         |                             |         |        |     |
|                             |                                             | Control vs. Anti $\alpha$ 2                 | <0.0001                     | 7.09     | 185                                         |                             |         |        |     |
|                             |                                             | Control vs. HFN7.1                          | <0.0001                     | 9.735    | 185                                         |                             |         |        |     |
|                             |                                             | Sol RGD vs. Anti $\alpha$ 2                 | 0.103                       | 2.405    | 185                                         |                             |         |        |     |
|                             |                                             | Sol RGD vs. HFN7.1                          | 0.0572                      | 0.5631   | 185                                         |                             |         |        |     |
|                             |                                             | Anti $\alpha$ 2 vs. HFN7.1                  | 0.0172                      | 3.022    | 185                                         |                             |         |        |     |

|                 |                                             |                                                     |                                    |         |                                             |                 |         |        |     |
|-----------------|---------------------------------------------|-----------------------------------------------------|------------------------------------|---------|---------------------------------------------|-----------------|---------|--------|-----|
|                 | f                                           | Two-way ANOVA<br>Bonferroni<br><i>post-hoc</i> test | Osteo: Control vs. Sol RGD         | 0.0008  | 4.243                                       | 40              |         |        |     |
|                 |                                             |                                                     | Osteo: Control vs. Anti $\alpha$ 2 | <0.0001 | 7.36                                        | 40              |         |        |     |
|                 |                                             |                                                     | Osteo: Control vs. HFN7.1          | <0.0001 | 7.119                                       | 40              |         |        |     |
|                 |                                             |                                                     | Osteo: Sol RGD vs. Anti $\alpha$ 2 | 0.0202  | 3.118                                       | 40              |         |        |     |
|                 |                                             |                                                     | Osteo: Sol RGD vs. HFN7.1          | 0.0385  | 2.877                                       | 40              |         |        |     |
|                 |                                             |                                                     | Osteo: Anti $\alpha$ 2 vs. HFN7.1  | >0.9999 | 0.2409                                      | 40              |         |        |     |
|                 |                                             |                                                     | Adipo: Control vs. Sol RGD         | 0.076   | 2.611                                       | 40              |         |        |     |
|                 |                                             |                                                     | Adipo: Control vs. Anti $\alpha$ 2 | 0.0026  | 3.83                                        | 40              |         |        |     |
|                 |                                             |                                                     | Adipo: Control vs. HFN7.1          | 0.0003  | 4.533                                       | 40              |         |        |     |
|                 |                                             |                                                     | Adipo: Sol RGD vs. Anti $\alpha$ 2 | >0.9999 | 1.22                                        | 40              |         |        |     |
|                 |                                             |                                                     | Adipo: Sol RGD vs. HFN7.1          | 0.3703  | 1.922                                       | 40              |         |        |     |
|                 |                                             |                                                     | Adipo: Anti $\alpha$ 2 vs. HFN7.1  | >0.9999 | 0.7024                                      | 40              |         |        |     |
|                 |                                             |                                                     | 4                                  | d       | ANOVA<br>Bonferroni<br><i>post-hoc</i> test | 0.00% vs. 1.25% | >0.9999 | 0.1836 | 207 |
|                 |                                             |                                                     |                                    |         |                                             | 0.00% vs. 2.50% | <0.0001 | 6.478  | 207 |
| 0.00% vs. 3.50% | <0.0001                                     | 7.268                                               |                                    |         |                                             | 207             |         |        |     |
| 1.25% vs. 2.50% | <0.0001                                     | 7.392                                               |                                    |         |                                             | 207             |         |        |     |
| 1.25% vs. 3.50% | <0.0001                                     | 8.311                                               |                                    |         |                                             | 207             |         |        |     |
| 2.50% vs. 3.50% | >0.9999                                     | 0.9471                                              |                                    |         |                                             | 207             |         |        |     |
| e               | ANOVA<br>Bonferroni<br><i>post-hoc</i> test | 0.0 vs. 0.2                                         |                                    |         |                                             | 0.2144          | 2.119   | 151    |     |
|                 |                                             | 0.0 vs. 0.3                                         |                                    |         |                                             | 0.1298          | 2.321   | 151    |     |
|                 |                                             | 0.0 vs. 0.4                                         |                                    |         |                                             | >0.9999         | 1.008   | 151    |     |
|                 |                                             | 0.2 vs. 0.3                                         |                                    |         |                                             | >0.9999         | 1.01    | 151    |     |
|                 |                                             | 0.2 vs. 0.4                                         |                                    |         |                                             | <0.0001         | 5.475   | 151    |     |
|                 |                                             | 0.3 vs. 0.4                                         |                                    |         |                                             | <0.0001         | 6.843   | 151    |     |
| 5               | b (left)                                    | ANOVA<br>Bonferroni<br><i>post-hoc</i> test         | Control vs. TIMP-3                 | <0.0001 | 11.96                                       | 432             |         |        |     |
|                 |                                             |                                                     | Control vs. Exo-1                  | <0.0001 | 11.9                                        | 432             |         |        |     |
|                 |                                             |                                                     | TIMP-3 vs. Exo-1                   | >0.9999 | 0.5994                                      | 432             |         |        |     |
|                 | b (right)                                   | ANOVA<br>Bonferroni<br><i>post-hoc</i> test         | Control vs. TIMP-3                 | <0.0001 | 6.71                                        | 147             |         |        |     |
|                 |                                             |                                                     | Control vs. Exo-1                  | <0.0001 | 4.451                                       | 147             |         |        |     |
|                 |                                             |                                                     | TIMP-3 vs. Exo-1                   | <0.0001 | 9.886                                       | 147             |         |        |     |
|                 | d                                           | ANOVA<br>Bonferroni<br><i>post-hoc</i> test         | Control vs. TIMP-3                 | <0.0001 | 7.313                                       | 134             |         |        |     |
|                 |                                             |                                                     | Control vs. Exo-1                  | <0.0001 | 11.43                                       | 134             |         |        |     |
|                 |                                             |                                                     | TIMP-3 vs. Exo-1                   | 0.0013  | 3.619                                       | 134             |         |        |     |
|                 | f                                           | Two-way ANOVA<br>Bonferroni                         | Osteo: Control vs. Exo-1           | <0.0001 | 5.215                                       | 30              |         |        |     |
|                 |                                             |                                                     | Osteo: Control vs. TIMP-3          | 0.0008  | 4.111                                       | 30              |         |        |     |

|    |           |                                             |                           |         |          |     |
|----|-----------|---------------------------------------------|---------------------------|---------|----------|-----|
|    |           | <i>post-hoc test</i>                        | Osteo: Exo-1 vs. TIMP-3   | 0.8346  | 1.104    | 30  |
|    |           |                                             | Adipo: Control vs. Exo-1  | <0.0001 | 6.709    | 30  |
|    |           |                                             | Adipo: Control vs. TIMP-3 | <0.0001 | 6.058    | 30  |
|    |           |                                             | Adipo: Exo-1 vs. TIMP-3   | >0.9999 | 0.6507   | 30  |
| S3 | b (upper) | ANOVA<br>Bonferroni<br><i>post-hoc test</i> | 4 hours vs. Day 1         | >0.9999 | 0.6305   | 515 |
|    |           |                                             | 4 hours vs. Day 2         | 0.9983  | 1.274    | 515 |
|    |           |                                             | 4 hours vs. Day 3         | 0.997   | 1.32     | 515 |
|    |           |                                             | 4 hours vs. Day 4         | >0.9999 | 0.1364   | 515 |
|    |           |                                             | 4 hours vs. Day 5         | >0.9999 | 0.3815   | 515 |
|    |           |                                             | 4 hours vs. Day 6         | 0.907   | 1.746    | 515 |
|    |           |                                             | 4 hours vs. Day 14        | >0.9999 | 0.003466 | 515 |
|    |           |                                             | Day 1 vs. Day 2           | >0.9999 | 0.7503   | 515 |
|    |           |                                             | Day 1 vs. Day 3           | >0.9999 | 0.7921   | 515 |
|    |           |                                             | Day 1 vs. Day 4           | >0.9999 | 0.8634   | 515 |
|    |           |                                             | Day 1 vs. Day 5           | 0.9998  | 1.136    | 515 |
|    |           |                                             | Day 1 vs. Day 6           | 0.1885  | 2.688    | 515 |
|    |           |                                             | Day 1 vs. Day 14          | >0.9999 | 0.6747   | 515 |
|    |           |                                             | Day 2 vs. Day 3           | >0.9999 | 0.01958  | 515 |
|    |           |                                             | Day 2 vs. Day 4           | 0.9701  | 1.567    | 515 |
|    |           |                                             | Day 2 vs. Day 5           | 0.8644  | 1.823    | 515 |
|    |           |                                             | Day 2 vs. Day 6           | 0.0276  | 3.31     | 515 |
|    |           |                                             | Day 2 vs. Day 14          | 0.9957  | 1.353    | 515 |
|    |           |                                             | Day 3 vs. Day 4           | 0.9533  | 1.63     | 515 |
|    |           |                                             | Day 3 vs. Day 5           | 0.8175  | 1.893    | 515 |
|    |           |                                             | Day 3 vs. Day 6           | 0.0187  | 3.421    | 515 |
|    |           |                                             | Day 3 vs. Day 14          | 0.9925  | 1.406    | 515 |
|    |           |                                             | Day 4 vs. Day 5           | >0.9999 | 0.2751   | 515 |
|    |           |                                             | Day 4 vs. Day 6           | 0.8765  | 1.803    | 515 |
|    |           |                                             | Day 4 vs. Day 14          | >0.9999 | 0.1411   | 515 |
|    |           |                                             | Day 5 vs. Day 6           | 0.9798  | 1.516    | 515 |
|    |           |                                             | Day 5 vs. Day 14          | >0.9999 | 0.4013   | 515 |
|    |           |                                             | Day 6 vs. Day 14          | 0.8465  | 1.851    | 515 |
|    | b (lower) | ANOVA<br>Bonferroni<br><i>post-hoc test</i> | 4 hours vs. Day 1         | <0.0001 | 6.839    | 427 |
|    |           |                                             | 4 hours vs. Day 2         | <0.0001 | 5.955    | 427 |
|    |           |                                             | 4 hours vs. Day 3         | <0.0001 | 12.43    | 427 |
|    |           |                                             | 4 hours vs. Day 4         | <0.0001 | 12.05    | 427 |
|    |           |                                             | 4 hours vs. Day 5         | <0.0001 | 11.8     | 427 |
|    |           |                                             | 4 hours vs. Day 6         | <0.0001 | 14.04    | 427 |
|    |           |                                             | 4 hours vs. Day 14        | <0.0001 | 10.14    | 427 |
|    |           |                                             | Day 1 vs. Day 2           | >0.9999 | 0.6257   | 427 |
|    |           |                                             | Day 1 vs. Day 3           | <0.0001 | 6.716    | 427 |

|    |           |                      |                               |         |         |     |
|----|-----------|----------------------|-------------------------------|---------|---------|-----|
|    |           |                      | Day 1 vs. Day 4               | <0.0001 | 6.507   | 427 |
|    |           |                      | Day 1 vs. Day 5               | <0.0001 | 6.25    | 427 |
|    |           |                      | Day 1 vs. Day 6               | <0.0001 | 8.474   | 427 |
|    |           |                      | Day 1 vs. Day 14              | 0.0004  | 4.403   | 427 |
|    |           |                      | Day 2 vs. Day 3               | <0.0001 | 6.903   | 427 |
|    |           |                      | Day 2 vs. Day 4               | <0.0001 | 6.718   | 427 |
|    |           |                      | Day 2 vs. Day 5               | <0.0001 | 6.476   | 427 |
|    |           |                      | Day 2 vs. Day 6               | <0.0001 | 8.538   | 427 |
|    |           |                      | Day 2 vs. Day 14              | <0.0001 | 4.73    | 427 |
|    |           |                      | Day 3 vs. Day 4               | >0.9999 | 0.1583  | 427 |
|    |           |                      | Day 3 vs. Day 5               | >0.9999 | 0.05304 | 427 |
|    |           |                      | Day 3 vs. Day 6               | >0.9999 | 1.475   | 427 |
|    |           |                      | Day 3 vs. Day 14              | >0.9999 | 1.765   | 427 |
|    |           |                      | Day 4 vs. Day 5               | >0.9999 | 0.2007  | 427 |
|    |           |                      | Day 4 vs. Day 6               | >0.9999 | 1.232   | 427 |
|    |           |                      | Day 4 vs. Day 14              | >0.9999 | 1.833   | 427 |
|    |           |                      | Day 5 vs. Day 6               | >0.9999 | 1.441   | 427 |
|    |           |                      | Day 5 vs. Day 14              | >0.9999 | 1.626   | 427 |
|    |           |                      | Day 6 vs. Day 14              | 0.0442  | 3.18    | 427 |
|    | d (left)  | ANOVA                | 'D1 Softer' vs. 'D1 Stiffer'  | 0.0478  | 2.671   | 302 |
|    |           | Bonferroni           | 'D1 Softer' vs. 'D6 Softer'   | 0.5343  | 1.706   | 302 |
|    |           | <i>post-hoc test</i> | 'D1 Softer' vs. 'D6 Stiffer'  | 0.3627  | 1.885   | 302 |
|    |           |                      | 'D1 Stiffer' vs. 'D6 Softer'  | 0.0005  | 3.984   | 302 |
|    |           |                      | 'D1 Stiffer' vs. 'D6 Stiffer' | >0.9999 | 0.767   | 302 |
|    |           |                      | 'D6 Softer' vs. 'D6 Stiffer'  | 0.0066  | 3.297   | 302 |
|    | d (right) | ANOVA                | 'D1 Softer' vs. 'D1 Stiffer'  | <0.0001 | 9.332   | 258 |
|    |           | Bonferroni           | 'D1 Softer' vs. 'D6 Softer'   | 0.0035  | 3.481   | 258 |
|    |           | <i>post-hoc test</i> | 'D1 Softer' vs. 'D6 Stiffer'  | 0.0008  | 3.885   | 258 |
|    |           |                      | 'D1 Stiffer' vs. 'D6 Softer'  | <0.0001 | 12.59   | 258 |
|    |           |                      | 'D1 Stiffer' vs. 'D6 Stiffer' | <0.0001 | 4.42    | 258 |
|    |           |                      | 'D6 Softer' vs. 'D6 Stiffer'  | <0.0001 | 6.882   | 258 |
| S5 | b (upper) | ANOVA                | 4 hours vs. Day 1             | >0.9999 | 0.2462  | 511 |
|    |           | Bonferroni           | 4 hours vs. Day 2             | >0.9999 | 0.5732  | 511 |
|    |           | <i>post-hoc test</i> | 4 hours vs. Day 3             | 0.6834  | 2.056   | 511 |
|    |           |                      | 4 hours vs. Day 4             | <0.0001 | 7.766   | 511 |
|    |           |                      | 4 hours vs. Day 5             | <0.0001 | 5.125   | 511 |
|    |           |                      | 4 hours vs. Day 6             | <0.0001 | 6.436   | 511 |
|    |           |                      | 4 hours vs. Day 14            | <0.0001 | 7.938   | 511 |
|    |           |                      | Day 1 vs. Day 2               | >0.9999 | 0.336   | 511 |
|    |           |                      | Day 1 vs. Day 3               | 0.8538  | 1.84    | 511 |
|    |           |                      | Day 1 vs. Day 4               | <0.0001 | 7.746   | 511 |

|           |                      |                    |         |        |     |
|-----------|----------------------|--------------------|---------|--------|-----|
|           |                      | Day 1 vs. Day 5    | <0.0001 | 5.014  | 511 |
|           |                      | Day 1 vs. Day 6    | <0.0001 | 6.371  | 511 |
|           |                      | Day 1 vs. Day 14   | <0.0001 | 7.913  | 511 |
|           |                      | Day 2 vs. Day 3    | 0.9882  | 1.454  | 511 |
|           |                      | Day 2 vs. Day 4    | <0.0001 | 7.374  | 511 |
|           |                      | Day 2 vs. Day 5    | 0.0001  | 4.667  | 511 |
|           |                      | Day 2 vs. Day 6    | <0.0001 | 6      | 511 |
|           |                      | Day 2 vs. Day 14   | <0.0001 | 7.558  | 511 |
|           |                      | Day 3 vs. Day 4    | <0.0001 | 7.123  | 511 |
|           |                      | Day 3 vs. Day 5    | 0.003   | 3.902  | 511 |
|           |                      | Day 3 vs. Day 6    | <0.0001 | 5.483  | 511 |
|           |                      | Day 3 vs. Day 14   | <0.0001 | 7.283  | 511 |
|           |                      | Day 4 vs. Day 5    | 0.3272  | 2.464  | 511 |
|           |                      | Day 4 vs. Day 6    | 0.9759  | 1.539  | 511 |
|           |                      | Day 4 vs. Day 14   | >0.9999 | 0.5862 | 511 |
|           |                      | Day 5 vs. Day 6    | >0.9999 | 1.048  | 511 |
|           |                      | Day 5 vs. Day 14   | 0.1083  | 2.884  | 511 |
|           |                      | Day 6 vs. Day 14   | 0.703   | 2.034  | 511 |
| b (lower) | ANOVA                | 4 hours vs. Day 1  | 0.7242  | 2.011  | 441 |
|           | Bonferroni           | 4 hours vs. Day 2  | 0.9987  | 1.253  | 441 |
|           | <i>post-hoc</i> test | 4 hours vs. Day 3  | <0.0001 | 5.606  | 441 |
|           |                      | 4 hours vs. Day 4  | <0.0001 | 6.644  | 441 |
|           |                      | 4 hours vs. Day 5  | <0.0001 | 11.57  | 441 |
|           |                      | 4 hours vs. Day 6  | <0.0001 | 15.6   | 441 |
|           |                      | 4 hours vs. Day 14 | <0.0001 | 11.58  | 441 |
|           |                      | Day 1 vs. Day 2    | >0.9999 | 0.6733 | 441 |
|           |                      | Day 1 vs. Day 3    | 0.0005  | 4.341  | 441 |
|           |                      | Day 1 vs. Day 4    | <0.0001 | 5.591  | 441 |
|           |                      | Day 1 vs. Day 5    | <0.0001 | 11.4   | 441 |
|           |                      | Day 1 vs. Day 6    | <0.0001 | 16.44  | 441 |
|           |                      | Day 1 vs. Day 14   | <0.0001 | 11.5   | 441 |
|           |                      | Day 2 vs. Day 3    | 0.0003  | 4.485  | 441 |
|           |                      | Day 2 vs. Day 4    | <0.0001 | 5.601  | 441 |
|           |                      | Day 2 vs. Day 5    | <0.0001 | 10.81  | 441 |
|           |                      | Day 2 vs. Day 6    | <0.0001 | 15.07  | 441 |
|           |                      | Day 2 vs. Day 14   | <0.0001 | 10.82  | 441 |
|           |                      | Day 3 vs. Day 4    | 0.9948  | 1.37   | 441 |
|           |                      | Day 3 vs. Day 5    | <0.0001 | 7.35   | 441 |
|           |                      | Day 3 vs. Day 6    | <0.0001 | 11.99  | 441 |
|           |                      | Day 3 vs. Day 14   | <0.0001 | 7.24   | 441 |
|           |                      | Day 4 vs. Day 5    | <0.0001 | 5.892  | 441 |
|           |                      | Day 4 vs. Day 6    | <0.0001 | 10.25  | 441 |

|           |                                             |                                             |                                          |         |          |     |
|-----------|---------------------------------------------|---------------------------------------------|------------------------------------------|---------|----------|-----|
|           |                                             |                                             | Day 4 vs. Day 14                         | <0.0001 | 5.706    | 441 |
|           |                                             |                                             | Day 5 vs. Day 6                          | 0.0077  | 3.665    | 441 |
|           |                                             |                                             | Day 5 vs. Day 14                         | >0.9999 | 0.4519   | 441 |
|           |                                             |                                             | Day 6 vs. Day 14                         | 0.0005  | 4.349    | 441 |
| d (left)  | ANOVA<br>Bonferroni<br><i>post-hoc</i> test |                                             | 'D1 Softer' vs. 'D1 Stiffer'             | >0.9999 | 0.7192   | 353 |
|           |                                             |                                             | 'D1 Softer' vs. 'D6 Softer'              | <0.0001 | 7.427    | 353 |
|           |                                             |                                             | 'D1 Softer' vs. 'D6 Stiffer'             | 0.2127  | 2.111    | 353 |
|           |                                             |                                             | 'D1 Stiffer' vs. 'D6 Softer'             | <0.0001 | 8.36     | 353 |
|           |                                             |                                             | 'D1 Stiffer' vs. 'D6 Stiffer'            | 0.0266  | 2.864    | 353 |
|           |                                             |                                             | 'D6 Softer' vs. 'D6 Stiffer'             | <0.0001 | 5.091    | 353 |
| d (right) | ANOVA<br>Bonferroni<br><i>post-hoc</i> test |                                             | 'D1 Softer' vs. 'D1 Stiffer'             | 0.2851  | 1.995    | 188 |
|           |                                             |                                             | 'D1 Softer' vs. 'D6 Softer'              | <0.0001 | 8.045    | 188 |
|           |                                             |                                             | 'D1 Softer' vs. 'D6 Stiffer'             | >0.9999 | 1.15     | 188 |
|           |                                             |                                             | 'D1 Stiffer' vs. 'D6 Softer'             | <0.0001 | 10.25    | 188 |
|           |                                             |                                             | 'D1 Stiffer' vs. 'D6 Stiffer'            | 0.0145  | 3.076    | 188 |
|           |                                             |                                             | 'D6 Softer' vs. 'D6 Stiffer'             | <0.0001 | 6.5      | 188 |
| S8        | b                                           | ANOVA<br>Bonferroni<br><i>post-hoc</i> test | 0 hours vs. Day 1                        | >0.9999 | 0.4748   | 244 |
|           |                                             |                                             | 0 hours vs. Day 6                        | 0.1349  | 2.489    | 244 |
|           |                                             |                                             | 0 hours vs. Day 6 (FBS)                  | <0.0001 | 6.705    | 244 |
|           |                                             |                                             | 0 hours vs. Day 1 (FBS)                  | >0.9999 | 0.4833   | 244 |
|           |                                             |                                             | Day 1 vs. Day 6                          | 0.0258  | 3.045    | 244 |
|           |                                             |                                             | Day 1 vs. Day 6 (FBS)                    | <0.0001 | 7.499    | 244 |
|           |                                             |                                             | Day 1 vs. Day 1 (FBS)                    | >0.9999 | 0.01772  | 244 |
|           |                                             |                                             | Day 6 vs. Day 6 (FBS)                    | 0.0011  | 3.923    | 244 |
|           |                                             |                                             | Day 6 vs. Day 1 (FBS)                    | 0.0289  | 3.009    | 244 |
|           |                                             |                                             | Day 6 (FBS) vs. Day 1 (FBS)              | <0.0001 | 7.368    | 244 |
| S9        | b (left)                                    | <i>t</i> -test, two-tailed                  | (+) RGD vs. (-) RGD                      | <0.0001 | 9.212    | 72  |
|           | b (right)                                   | <i>t</i> -test, two-tailed                  | (+) RGD vs. (-) RGD                      | <0.0001 | 22.27    | 18  |
| S11       | b                                           | ANOVA<br>Bonferroni<br><i>post-hoc</i> test | Control vs. Sol RGD                      | 0.811   | 1.501    | 172 |
|           |                                             |                                             | Control vs. Anti $\alpha$ 2              | <0.0001 | 4.743    | 172 |
|           |                                             |                                             | Control vs. HFN7.1                       | >0.9999 | 0.007385 | 172 |
|           |                                             |                                             | Sol RGD vs. Anti $\alpha$ 2              | <0.0001 | 5.533    | 172 |
|           |                                             |                                             | Sol RGD vs. HFN7.1                       | >0.9999 | 1.358    | 172 |
|           |                                             |                                             | Anti $\alpha$ 2 vs. HFN7.1               | 0.0001  | 4.339    | 172 |
|           | c                                           | ANOVA<br>Bonferroni<br><i>post-hoc</i> test | IgG <sub>1</sub> ( $\mu$ g/mL): 20 vs. 5 | >0.9999 | 0.7079   | 196 |
|           |                                             |                                             | IgG <sub>1</sub> ( $\mu$ g/mL): 20 vs. 0 | 0.0578  | 2.018    | 196 |
|           |                                             |                                             | IgG <sub>1</sub> ( $\mu$ g/mL): 5 vs. 0  | 0.2415  | 1.757    | 196 |

|     |            |                                             |                                          |         |         |     |
|-----|------------|---------------------------------------------|------------------------------------------|---------|---------|-----|
|     | d (left)   | ANOVA<br>Bonferroni<br><i>post-hoc test</i> | Anti $\alpha$ 2 ( $\mu$ g/mL): 0 vs. 10  | <0.0001 | 5.388   | 328 |
|     |            |                                             | Anti $\alpha$ 2 ( $\mu$ g/mL): 0 vs. 20  | <0.0001 | 8.285   | 328 |
|     |            |                                             | Anti $\alpha$ 2 ( $\mu$ g/mL): 0 vs. 40  | <0.0001 | 8.828   | 328 |
|     |            |                                             | Anti $\alpha$ 2 ( $\mu$ g/mL): 10 vs. 20 | 0.0144  | 3.06    | 328 |
|     |            |                                             | Anti $\alpha$ 2 ( $\mu$ g/mL): 10 vs. 40 | 0.006   | 3.323   | 328 |
|     |            |                                             | Anti $\alpha$ 2 ( $\mu$ g/mL): 20 vs. 40 | >0.9999 | 0.08731 | 328 |
|     | d (middle) | ANOVA<br>Bonferroni<br><i>post-hoc test</i> | HFN7.1 ( $\mu$ g/mL): 0 vs. 5            | <0.0001 | 6.353   | 190 |
|     |            |                                             | HFN7.1 ( $\mu$ g/mL): 0 vs. 10           | <0.0001 | 5.76    | 190 |
|     |            |                                             | HFN7.1 ( $\mu$ g/mL): 5 vs. 10           | >0.9999 | 0.6006  | 190 |
|     | d (right)  | ANOVA<br>Bonferroni<br><i>post-hoc test</i> | RGD (mM): 0.00 vs. 0.25                  | <0.0001 | 7.124   | 241 |
|     |            |                                             | RGD (mM): 0.00 vs. 0.50                  | <0.0001 | 8.234   | 241 |
|     |            |                                             | RGD (mM): 0.25 vs. 0.50                  | 0.6728  | 1.218   | 241 |
|     | e          | ANOVA<br>Bonferroni<br><i>post-hoc test</i> | Control vs. Sol RGD                      | 0.0885  | 3.096   | 8   |
|     |            |                                             | Control vs. Anti $\zeta$ 2               | 0.0289  | 3.86    | 8   |
|     |            |                                             | Control vs. HFN7.1                       | 0.0145  | 4.36    | 8   |
|     |            |                                             | Sol RGD vs. Anti $\zeta$ 2               | >0.9999 | 0.7635  | 8   |
|     |            |                                             | Sol RGD vs. HFN7.1                       | >0.9999 | 1.263   | 8   |
|     |            |                                             | Anti $\alpha$ 2 vs. HFN7.1               | >0.9999 | 0.5     | 8   |
| S12 | b (left)   | ANOVA<br>Bonferroni<br><i>post-hoc test</i> | Control vs. Sol RGD                      | <0.0001 | 9.321   | 278 |
|     |            |                                             | Control vs. Anti $\alpha$ 2              | <0.0001 | 7.753   | 278 |
|     |            |                                             | Control vs. HFN7.1                       | <0.0001 | 7.32    | 278 |
|     |            |                                             | Sol RGD vs. Anti $\alpha$ 2              | 0.0716  | 2.531   | 278 |
|     |            |                                             | Sol RGD vs. HFN7.1                       | 0.013   | 3.094   | 278 |
|     |            |                                             | Anti $\alpha$ 2 vs. HFN7.1               | >0.9999 | 0.6023  | 278 |
|     | b (right)  | ANOVA<br>Bonferroni<br><i>post-hoc test</i> | Control vs. Sol RGD                      | <0.0001 | 4.858   | 130 |
|     |            |                                             | Control vs. Anti $\zeta$ 2               | <0.0001 | 4.832   | 130 |
|     |            |                                             | Control vs. HFN7.1                       | 0.1453  | 2.28    | 130 |
|     |            |                                             | Sol RGD vs. Anti $\zeta$ 2               | >0.9999 | 0.02607 | 130 |
|     |            |                                             | Sol RGD vs. HFN7.1                       | 0.0812  | 2.503   | 130 |
|     |            |                                             | Anti $\zeta$ 2 vs. HFN7.1                | 0.087   | 2.478   | 130 |
| S15 | b (left)   | ANOVA<br>Bonferroni<br><i>post-hoc test</i> | 4 hours vs. Day 1                        | >0.9999 | 0.05008 | 364 |
|     |            |                                             | 4 hours vs. Day 3                        | <0.0001 | 5.143   | 364 |
|     |            |                                             | 4 hours vs. Day 6                        | <0.0001 | 6.267   | 364 |
|     |            |                                             | 4 hours vs. Day 14                       | <0.0001 | 7.693   | 364 |
|     |            |                                             | Day 1 vs. Day 3                          | <0.0001 | 5.982   | 364 |
|     |            |                                             | Day 1 vs. Day 6                          | <0.0001 | 7.126   | 364 |
|     |            |                                             | Day 1 vs. Day 14                         | <0.0001 | 8.788   | 364 |
|     |            |                                             | Day 3 vs. Day 6                          | 0.8915  | 1.704   | 364 |

|           |                                             |                                             |                    |         |        |     |
|-----------|---------------------------------------------|---------------------------------------------|--------------------|---------|--------|-----|
|           |                                             |                                             | Day 3 vs. Day 14   | 0.0117  | 3.272  | 364 |
|           |                                             |                                             | Day 6 vs. Day 14   | >0.9999 | 1.396  | 364 |
| b (right) | ANOVA<br>Bonferroni<br><i>post-hoc</i> test |                                             | 4 hours vs. Day 1  | 0.0013  | 3.899  | 238 |
|           |                                             |                                             | 4 hours vs. Day 3  | <0.0001 | 6.507  | 238 |
|           |                                             |                                             | 4 hours vs. Day 6  | <0.0001 | 8.238  | 238 |
|           |                                             |                                             | 4 hours vs. Day 14 | <0.0001 | 11.39  | 238 |
|           |                                             |                                             | Day 1 vs. Day 3    | 0.0005  | 4.125  | 238 |
|           |                                             |                                             | Day 1 vs. Day 6    | <0.0001 | 6.919  | 238 |
|           |                                             |                                             | Day 1 vs. Day 14   | <0.0001 | 11.49  | 238 |
|           |                                             |                                             | Day 3 vs. Day 6    | 0.132   | 2.497  | 238 |
|           |                                             |                                             | Day 3 vs. Day 14   | <0.0001 | 7.473  | 238 |
|           |                                             |                                             | Day 6 vs. Day 14   | <0.0001 | 5.495  | 238 |
| d (left)  | ANOVA<br>Bonferroni<br><i>post-hoc</i> test |                                             | 4 hours vs. Day 1  | >0.9999 | 0.5877 | 337 |
|           |                                             |                                             | 4 hours vs. Day 3  | <0.0001 | 7.518  | 337 |
|           |                                             |                                             | 4 hours vs. Day 6  | <0.0001 | 9.312  | 337 |
|           |                                             |                                             | 4 hours vs. Day 14 | <0.0001 | 8.835  | 337 |
|           |                                             |                                             | Day 1 vs. Day 3    | <0.0001 | 8.13   | 337 |
|           |                                             |                                             | Day 1 vs. Day 6    | <0.0001 | 10.14  | 337 |
|           |                                             |                                             | Day 1 vs. Day 14   | <0.0001 | 9.383  | 337 |
|           |                                             |                                             | Day 3 vs. Day 6    | 0.2231  | 2.296  | 337 |
|           |                                             |                                             | Day 3 vs. Day 14   | 0.1699  | 2.399  | 337 |
|           |                                             |                                             | Day 6 vs. Day 14   | >0.9999 | 0.3329 | 337 |
| d (right) | ANOVA<br>Bonferroni<br><i>post-hoc</i> test |                                             | 4 hours vs. Day 1  | <0.0001 | 4.852  | 227 |
|           |                                             |                                             | 4 hours vs. Day 3  | <0.0001 | 8.443  | 227 |
|           |                                             |                                             | 4 hours vs. Day 6  | <0.0001 | 7.523  | 227 |
|           |                                             |                                             | 4 hours vs. Day 14 | <0.0001 | 9.037  | 227 |
|           |                                             |                                             | Day 1 vs. Day 3    | <0.0001 | 5.331  | 227 |
|           |                                             |                                             | Day 1 vs. Day 6    | 0.0015  | 3.864  | 227 |
|           |                                             |                                             | Day 1 vs. Day 14   | <0.0001 | 6.236  | 227 |
|           |                                             |                                             | Day 3 vs. Day 6    | 0.533   | 1.943  | 227 |
|           |                                             |                                             | Day 3 vs. Day 14   | 0.6537  | 1.852  | 227 |
|           |                                             |                                             | Day 6 vs. Day 14   | 0.0056  | 3.498  | 227 |
| S16       | a                                           | ANOVA<br>Bonferroni<br><i>post-hoc</i> test | Control vs. Exo-1  | >0.9999 | 0.4375 | 63  |
|           |                                             |                                             | Control vs. TIMP-3 | >0.9999 | 0.15   | 63  |
|           |                                             |                                             | Exo-1 vs. TIMP-3   | >0.9999 | 0.2958 | 63  |
|           | b                                           | ANOVA<br>Bonferroni<br><i>post-hoc</i> test | Control vs. Exo-1  | >0.9999 | 0.623  | 57  |
|           |                                             |                                             | Control vs. TIMP-3 | >0.9999 | 0.6255 | 57  |
|           |                                             |                                             | Exo-1 vs. TIMP-3   | 0.6818  | 1.221  | 57  |



|     |           |                                             |                                   |         |        |     |
|-----|-----------|---------------------------------------------|-----------------------------------|---------|--------|-----|
|     | c         | ANOVA<br>Bonferroni<br><i>post-hoc test</i> | Control vs. TIMP-3                | >0.9999 | 0.1962 | 103 |
|     |           |                                             | Control vs. Exo-1                 | 0.3217  | 1.625  | 103 |
|     |           |                                             | TIMP-3 vs. Exo-1                  | 0.4695  | 1.427  | 103 |
| S17 | b (left)  | ANOVA<br>Bonferroni<br><i>post-hoc test</i> | Exo-1 vs. Control                 | <0.0001 | 10.7   | 239 |
|     |           |                                             | Exo-1 vs. TIMP-3                  | 0.399   | 1.508  | 239 |
|     |           |                                             | Control vs. TIMP-3                | <0.0001 | 9.484  | 239 |
|     | b (right) | ANOVA<br>Bonferroni<br><i>post-hoc test</i> | Exo-1 vs. Control                 | <0.0001 | 10.75  | 104 |
|     |           |                                             | Exo-1 vs. TIMP-3                  | <0.0001 | 7.016  | 104 |
|     |           |                                             | Control vs. TIMP-3                | 0.0231  | 2.718  | 104 |
| S18 | a         | <i>t</i> -test, two-tailed                  | Adipo-osteo vs. Growth            | 0.0007  | 4.804  | 10  |
|     | b         | <i>t</i> -test, two-tailed                  | Adipo-osteo vs. Growth            | 0.7863  | 0.2785 | 10  |
| S19 | b (left)  | ANOVA<br>Bonferroni<br><i>post-hoc test</i> | Day 6 Donor #1 vs. Day 6 Donor #2 | >0.9999 | 1.719  | 285 |
|     |           |                                             | Day 6 Donor #1 vs. Day 6 Donor #3 | 0.9746  | 1.853  | 285 |
|     |           |                                             | Day 6 Donor #1 vs. Day 1 Donor #1 | <0.0001 | 6.786  | 285 |
|     |           |                                             | Day 6 Donor #1 vs. Day 1 Donor #2 | <0.0001 | 5.147  | 285 |
|     |           |                                             | Day 6 Donor #1 vs. Day 1 Donor #3 | <0.0001 | 5.965  | 285 |
|     |           |                                             | Day 6 Donor #2 vs. Day 6 Donor #3 | 0.0312  | 3.107  | 285 |
|     |           |                                             | Day 6 Donor #2 vs. Day 1 Donor #1 | <0.0001 | 4.953  | 285 |
|     |           |                                             | Day 6 Donor #2 vs. Day 1 Donor #2 | 0.0053  | 3.618  | 285 |
|     |           |                                             | Day 6 Donor #2 vs. Day 1 Donor #3 | 0.0003  | 4.343  | 285 |
|     |           |                                             | Day 6 Donor #3 vs. Day 1 Donor #1 | <0.0001 | 7.047  | 285 |
|     |           |                                             | Day 6 Donor #3 vs. Day 1 Donor #2 | <0.0001 | 5.815  | 285 |
|     |           |                                             | Day 6 Donor #3 vs. Day 1 Donor #3 | <0.0001 | 6.467  | 285 |
|     |           |                                             | Day 1 Donor #1 vs. Day 1 Donor #2 | >0.9999 | 0.7161 | 285 |
|     |           |                                             | Day 1 Donor #1 vs. Day 1 Donor #3 | >0.9999 | 0.178  | 285 |
|     |           |                                             | Day 1 Donor #2 vs. Day 1 Donor #3 | >0.9999 | 0.5095 | 285 |
|     | b (right) | ANOVA<br>Bonferroni<br><i>post-hoc test</i> | Day 6 Donor #1 vs. Day 6 Donor #2 | <0.0001 | 7.282  | 245 |
|     |           |                                             | Day 6 Donor #1 vs. Day 6 Donor #3 | <0.0001 | 5.545  | 245 |
|     |           |                                             | Day 6 Donor #1 vs. Day 1 Donor #1 | <0.0001 | 17.39  | 245 |
|     |           |                                             | Day 6 Donor #1 vs. Day 1 Donor #2 | <0.0001 | 12.94  | 245 |
|     |           |                                             | Day 6 Donor #1 vs. Day 1 Donor #3 | <0.0001 | 11.01  | 245 |
|     |           |                                             | Day 6 Donor #2 vs. Day 6 Donor #3 | >0.9999 | 0.9597 | 245 |
|     |           |                                             | Day 6 Donor #2 vs. Day 1 Donor #1 | <0.0001 | 7.287  | 245 |

|           |                                      |                                   |         |         |     |
|-----------|--------------------------------------|-----------------------------------|---------|---------|-----|
|           |                                      | Day 6 Donor #2 vs. Day 1 Donor #2 | <0.0001 | 6.62    | 245 |
|           |                                      | Day 6 Donor #2 vs. Day 1 Donor #3 | 0.0033  | 3.75    | 245 |
|           |                                      | Day 6 Donor #3 vs. Day 1 Donor #1 | <0.0001 | 7.701   | 245 |
|           |                                      | Day 6 Donor #3 vs. Day 1 Donor #2 | <0.0001 | 7.094   | 245 |
|           |                                      | Day 6 Donor #3 vs. Day 1 Donor #3 | 0.0002  | 4.421   | 245 |
|           |                                      | Day 1 Donor #1 vs. Day 1 Donor #2 | >0.9999 | 1.445   | 245 |
|           |                                      | Day 1 Donor #1 vs. Day 1 Donor #3 | 0.1481  | 2.601   | 245 |
|           |                                      | Day 1 Donor #2 vs. Day 1 Donor #3 | 0.0211  | 3.23    | 245 |
| d (left)  | ANOVA<br>Bonferroni<br>post-hoc test | Day 1 Donor #1 vs. Day 1 Donor #2 | >0.9999 | 0.2096  | 274 |
|           |                                      | Day 1 Donor #1 vs. Day 1 Donor #3 | >0.9999 | 0.05963 | 274 |
|           |                                      | Day 1 Donor #2 vs. Day 1 Donor #3 | >0.9999 | 0.1619  | 274 |
|           |                                      | Day 6 Donor #1 vs. Day 6 Donor #2 | >0.9999 | 0.7079  | 274 |
|           |                                      | Day 6 Donor #1 vs. Day 6 Donor #3 | 0.5342  | 2.112   | 274 |
|           |                                      | Day 6 Donor #1 vs. Day 1 Donor #1 | <0.0001 | 5.343   | 274 |
|           |                                      | Day 6 Donor #1 vs. Day 1 Donor #2 | <0.0001 | 5.112   | 274 |
|           |                                      | Day 6 Donor #1 vs. Day 1 Donor #3 | <0.0001 | 5.657   | 274 |
|           |                                      | Day 6 Donor #2 vs. Day 6 Donor #3 | 0.0286  | 3.135   | 274 |
|           |                                      | Day 6 Donor #2 vs. Day 1 Donor #1 | <0.0001 | 6.39    | 274 |
|           |                                      | Day 6 Donor #2 vs. Day 1 Donor #2 | <0.0001 | 6.139   | 274 |
|           |                                      | Day 6 Donor #2 vs. Day 1 Donor #3 | <0.0001 | 6.859   | 274 |
|           |                                      | Day 6 Donor #3 vs. Day 1 Donor #1 | 0.0033  | 3.745   | 274 |
|           |                                      | Day 6 Donor #3 vs. Day 1 Donor #2 | 0.0081  | 3.503   | 274 |
|           |                                      | Day 6 Donor #3 vs. Day 1 Donor #3 | 0.0014  | 3.969   | 274 |
| d (right) | ANOVA<br>Bonferroni<br>post-hoc test | Day 1 Donor #1 vs. Day 1 Donor #2 | >0.9999 | 1.1     | 240 |
|           |                                      | Day 1 Donor #1 vs. Day 1 Donor #3 | 0.0771  | 2.824   | 240 |
|           |                                      | Day 1 Donor #2 vs. Day 1 Donor #3 | <0.0001 | 7.225   | 240 |
|           |                                      | Day 6 Donor #1 vs. Day 6 Donor #2 | <0.0001 | 6.955   | 240 |
|           |                                      | Day 6 Donor #1 vs. Day 6 Donor #3 | 0.177   | 2.537   | 240 |
|           |                                      | Day 6 Donor #1 vs. Day 1 Donor #1 | >0.9999 | 1.8     | 240 |
|           |                                      | Day 6 Donor #1 vs. Day 1 Donor #2 | <0.0001 | 7.807   | 240 |
|           |                                      | Day 6 Donor #1 vs. Day 1 Donor #3 | <0.0001 | 7.489   | 240 |
|           |                                      | Day 6 Donor #2 vs. Day 6 Donor #3 | 0.0214  | 3.227   | 240 |

|                                      |         |       |     |
|--------------------------------------|---------|-------|-----|
| Day 6 Donor #2 vs. Day 1<br>Donor #1 | <0.0001 | 8.545 | 240 |
| Day 6 Donor #2 vs. Day 1<br>Donor #2 | <0.0001 | 8.303 | 240 |
| Day 6 Donor #2 vs. Day 1<br>Donor #3 | 0.0002  | 4.398 | 240 |
| Day 6 Donor #3 vs. Day 1<br>Donor #1 | 0.9123  | 1.884 | 240 |
| Day 6 Donor #3 vs. Day 1<br>Donor #2 | 0.2057  | 2.483 | 240 |
| Day 6 Donor #3 vs. Day 1<br>Donor #3 | 0.0066  | 3.565 | 240 |
